# Supplementary material for: The first asymmetric ring-expansion carbonylation of meso-epoxides
Source: Royal Society of Chemistry journal article supplement (doi:10.1039/c2cc35596e), 2012-01-01
Supplement: c2cc35596e.pdf [file c2cc35596e.pdf]

# The First Asymmetric Ring-Expansion Carbonylation of *meso*-Epoxides

Prasad Ganji and Hasim Ibrahim\*

Centre for Synthesis and Chemical Biology, School of Chemistry and Chemical Biology,  
University College Dublin, Belfield, Dublin 4, Ireland

*hasim.ibrahim@ucd.ie*

## Supporting Information

### Table of Contents

|                                                                                                             |      |
|-------------------------------------------------------------------------------------------------------------|------|
| General Remarks                                                                                             | S-2  |
| Materials                                                                                                   | S-2  |
| General procedure for the preparation of $\beta$ -hydroxy benzylamides                                      | S-3  |
| General procedure for the asymmetric carbonylation of <i>meso</i> -epoxides                                 | S-7  |
| References                                                                                                  | S-14 |
| Copy of $^1\text{H}$ and $^{13}\text{C}$ NMR spectra of novel $\beta$ -hydroxy benzylamides and HPLC traces | S-15 |
| Crystal structure of ( $\pm$ )- <i>trans</i> - <i>N</i> -benzyl-8-hydroxycyclooct-4-enecarboxamide          | S-40 |

## General remarks

NMR spectra were recorded on a Varian 400 MHz FT spectrometer at room temperature with  $\text{CDCl}_3$  as the internal standard. The reference values used for  $\text{CDCl}_3$  were 7.26 and 77.0 ppm for  $^1\text{H}$  and  $^{13}\text{C}$  NMR spectra, respectively. High resolution mass spectra were measured on a Waters/Micromass GCT and Waters 2996 Photodiode Array Detector instruments. Infrared spectra were recorded on a Varian 3100 FT-IR spectrometer at room temperature. Melting points were recorded in open capillaries on a digital Barnsted Electro Thermal 9300 melting point apparatus and are uncorrected. Chiral HPLC analysis was performed on an Agilent technologies 1200 series instrument. Optical rotation values were measured at room temperature on a Perkin-Elmer 343 polarimeter. All carbonylation reactions were carried out in a 100 mL custom built Parr reactor equipped with magnetic stirrer, which has an inlet, outlet, syringe port and pressure burst valve. Heating was performed in an oil bath.

## Materials

All reagents were obtained from commercial suppliers and used without further purification. Carbon monoxide gas (99.97% purity) was purchased from CK Gas Ltd.  $\text{Co}_2(\text{CO})_8$  was purchased from Strem Chemicals and used as received. Jacobsen's catalysts (*R,R*)-(salen)CrCl **1** was purchased from Sigma Aldrich and used as received. Anhydrous DME was purchased from Sigma Aldrich and degassed prior to use. Dry THF was obtained from a solvent purification system and degassed prior to use. Thin layer chromatography was performed on Merck Aluminium sheets (silica gel 60 F<sub>254</sub>). Detection was carried out by UV and by coloration with ceric ammonium molybdate (CAM) or vanillin. Flash column chromatography was performed using Merck silica gel 60 (230-400 mesh). The enantiomeric excess was determined by chiral HPLC analysis on a CHIRALPAK<sup>®</sup> IB column using HPLC

grade *n*-heptane and ethanol as the eluent.  $\beta$ -Lactones without a UV active chromophore were measured after conversion into the  $\beta$ -hydroxy benzylamide derivatives.

The following compounds were synthesized according to literature procedures:

[(*R,R*)-(salen)Cr]BF<sub>4</sub> **2**,<sup>1</sup> *D*<sub>4</sub>-symmetric porphyrin Cr(III) chloride **3**,<sup>2</sup> 1,2-epoxy-5-cyclooctene,<sup>3</sup> *cis*-cyclooctane oxide,<sup>4</sup> *cis*-cycloheptene oxide,<sup>5</sup> *cis*-cyclopentene oxide,<sup>6</sup> *cis*-1,2-epoxycyclododecane,<sup>7</sup> *cis*-1,4-dibenzyloxy-2,3-epoxybutane,<sup>8</sup> 3,4-epoxytetrahydrofuran,<sup>9</sup> dimethyl 6-oxabicyclo[3.1.0]hexane-3,3-dicarboxylate<sup>10</sup> and 1-tosyl-2,3,6,7-tetrahydro-1*H*-azepine.<sup>11</sup> All epoxides were purified/dried by either column chromatography or by distillation over CaH<sub>2</sub> prior to use. Racemic  $\beta$ -lactones were prepared according to our previously published procedure.<sup>10</sup>

## General procedure for the preparation of $\beta$ -hydroxy benzylamides (GP I)

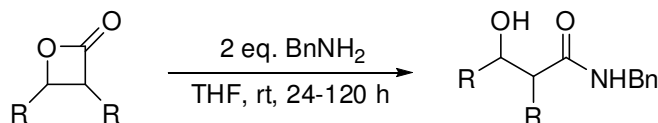

In an oven-dried Schlenk tube, a  $\beta$ -lactone (0.6-1.0 mmol) and anhydrous THF (3 mL) were charged under  $N_2$  atmosphere. To this stirred solution was added  $BnNH_2$  (2 eq.) *via* a syringe and the resulting mixture was stirred at room temperature until TLC analysis showed complete consumption of the  $\beta$ -lactone (24-120 h). The reaction mixture was evaporated under reduced pressure and the residue was purified by flash column chromatography to give the  $\beta$ -hydroxy benzylamide derivatives.

### ( $\pm$ )-*trans*-N-Benzyl-8-hydroxycyclooct-4-enecarboxamide

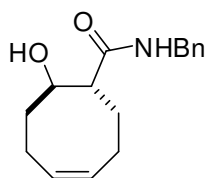

According to GP I, the racemic  $\beta$ -lactone (100 mg, 0.65 mmol) and benzylamine (137 mg, 1.3 mmol) in THF (3 mL) were stirred at room temperature for 24 h. The title compound was isolated by flash column

chromatography ( $SiO_2$ ; pentane/EtOAc, 90:10) as a white solid (164 mg, 96%).

Mp: 172-176 °C; IR (KBr,  $cm^{-1}$ ): 3397, 2948, 1654, 1283;  $^1H$  NMR (400 MHz,  $CDCl_3$ ):  $\delta$  1.48-1.72 (m, 2 H,  $CH_2$ ), 1.68-1.82 (m, 1 H,  $CHH$ ), 1.91-2.01 (m, 1 H,  $CHH$ ), 2.02-2.35 (m, 4 H,  $CH_2$ ), 2.36-2.48 (m, 1 H,  $CHH$ ), 2.52 (ddd,  $J = 11.3, 8.1, 3.3$  Hz, 1 H,  $CHCO$ ), 3.12 (brs, 1 H,  $CHOH$ ), 4.01 (ddd,  $J = 16.0, 8.1, 3.4$  Hz, 1 H,  $CHOH$ ), 4.40 (dd,  $J = 14.8, 5.7$  Hz, 1 H,  $CHHPh$ ), 4.47 (dd,  $J = 14.8, 5.7$  Hz, 1 H,  $CHHPh$ ), 5.52-5.56 (m, 1 H,  $CH=CH$ ), 5.63-5.77 (m, 1 H,  $CH=CH$ ), 5.86 (brs, 1 H,  $CONH$ ), 7.16-7.43 (m, 5 H, Ar-H);  $^{13}C$  NMR (100 MHz,  $CDCl_3$ ):  $\delta$  23.2, 24.0, 30.2, 35.3, 43.6, 52.3, 72.0, 127.6, 127.7, 128.0, 128.8, 131.0, 138.0, 175.9; HRMS (EI):  $C_{16}H_{22}NO_2$  [ $M + H$ ] $^+$  calculated: 260.1651, found: 260.1656.

**(±)-*trans*-N-Benzyl-2-hydroxycyclododecanecarboxamide**

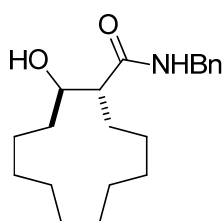

According to GP I, the racemic  $\beta$ -lactone (100 mg, 0.47 mmol), benzylamine (137 mg, 1.3 mmol) in THF (3 mL) were stirred at room temperature for 5 days. The title compound was isolated by flash column chromatography (SiO<sub>2</sub>; pentane/EtOAc, 90:10) as a white solid (131 mg, 87%). Mp: 181-185 °C; IR (KBr, cm<sup>-1</sup>): 3312, 1661, 1610, 1220; <sup>1</sup>H NMR (400 MHz, CDCl<sub>3</sub>):  $\delta$  1.13-1.53 (m, 16 H, CH<sub>2</sub>), 1.52-1.69 (m, 6 H, CH<sub>2</sub>), 2.40 (dd,  $J$  = 13.1, 6.0 Hz, 1 H, CHCO), 3.07 (brs, 1 H, CHOH), 4.04-4.08 (m, 1 H, CHOH), 4.48 (dd,  $J$  = 15.6, 5.7 Hz, 1 H, CHHPh), 4.48 (dd,  $J$  = 15.6, 5.7 Hz, 1 H, CHHPh), 6.01 (brs, 1 H, CONH), 7.14-7.46 (m, 5 H, Ar-H); <sup>13</sup>C NMR (75 MHz, CDCl<sub>3</sub>):  $\delta$  20.6, 22.2, 23.3, 23.35, 23.6, 23.7, 23.9, 26.7, 31.0, 43.5, 48.0, 69.0, 76.7, 127.5, 127.7, 128.7, 138.2, 175.2; HRMS (EI): C<sub>20</sub>H<sub>31</sub>NO<sub>2</sub> [M + H]<sup>+</sup> calculated: 318.2433, found: 318.2444.

**(±)-*trans*-N-Benzyl-2-hydroxycyclooctanecarboxamide**

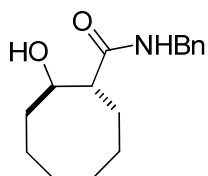

According to GP I, the racemic  $\beta$ -lactone (100 mg, 0.65 mmol) and benzylamine (101 mg, 0.95 mmol) in THF (3 mL) were stirred at room temperature for 24 h. The title compound was isolated by flash column chromatography (SiO<sub>2</sub>; pentane/EtOAc, 90:10) as a white solid (159 mg, 94%). Mp: 186-189 °C; IR (KBr, cm<sup>-1</sup>): 3403, 2929, 1654, 1236; <sup>1</sup>H NMR (400 MHz, CDCl<sub>3</sub>):  $\delta$  1.40-1.80 (m, 10 H, CH<sub>2</sub>), 1.81-1.98 (m, 2 H, CH<sub>2</sub>), 2.35 (ddd,  $J$  = 10.1, 7.7, 2.7 Hz, 1 H, CHCO), 2.61 (brs, 1 H, CHOH), 4.01 (virtual t,  $J$  = 8.5 Hz, 1 H, CHOH), 4.44 (dd,  $J$  = 14.6, 5.6 Hz, 1 H, CHHPh), 4.46 (dd,  $J$  = 14.8, 5.9 Hz, 1 H, CHHPh), 6.14 (brs, 1 H, CONH), 7.16-7.43 (m, 5 H, Ar-H); <sup>13</sup>C NMR (100 MHz, CDCl<sub>3</sub>):  $\delta$  23.1, 25.3, 26.7, 27.5, 33.3, 43.5, 52.1, 72.4, 127.4, 127.7, 128.5, 128.7, 138.3, 176.2; HRMS (ESI): C<sub>16</sub>H<sub>23</sub>NO<sub>2</sub> [M + Na]<sup>+</sup> calculated: 284.1626, found: 284.1638.

**(±)-*trans*-N-Benzyl-2-hydroxycycloheptanecarboxamide**

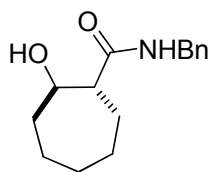

According to GP I, the racemic  $\beta$ -lactone (100 mg, 0.71 mmol) and benzylamine (151 mg, 1.42 mmol) in THF (3 mL) were stirred at room temperature for 24 h. The title compound was isolated by flash column chromatography (SiO<sub>2</sub>; pentane/EtOAc, 90:10) as a white solid (158 mg, 90%). Mp: 148-153 °C; IR (KBr, cm<sup>-1</sup>): 3403, 2929, 1654, 1236; <sup>1</sup>H NMR (400 MHz, CDCl<sub>3</sub>):  $\delta$  1.39-2.02 (m, 10 H, CH<sub>2</sub>), 2.24 (ddd,  $J$  = 12.1, 9.4, 2.5 Hz, 1 H, CHCO), 2.61 (brs, 1 H, CHOH), 4.01 (virtual t,  $J$  = 8.5 Hz, 1 H, CHOH), 4.42 (dd,  $J$  = 14.8, 5.7 Hz, 1 H, CHHPh), 4.46 (dd,  $J$  = 14.8, 5.7 Hz, 1 H, CHHPh), 6.14 (brs, 1 H, CONH), 7.16-7.43 (m, 5 H, Ar-H); <sup>13</sup>C NMR (100 MHz, CDCl<sub>3</sub>):  $\delta$  22.8, 27.3, 28.0, 28.3, 36.7, 43.9, 55.3, 74.4, 127.9, 128.1, 129.2, 138.8, 176.3; HRMS (EI): C<sub>15</sub>H<sub>21</sub>NO<sub>2</sub> [M]<sup>+</sup> calculated: 247.1572, found: 247.1564.

**(±)-*cis*-N-Benzyl-2-hydroxycyclopentanecarboxamide<sup>12</sup>**

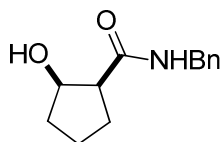

According to GP I, the racemic  $\beta$ -lactone (100 mg, 0.9 mmol) and benzylamine (189 mg, 1.8 mmol) in THF (3 mL) were stirred at room temperature for 24 h. The title compound was isolated by flash column chromatography (SiO<sub>2</sub>; pentane/EtOAc, 90:10) as a white solid (195 mg, 98%). Mp: 85-89 °C; IR (KBr, cm<sup>-1</sup>): 3400, 3020, 1655, 1222; <sup>1</sup>H NMR (400 MHz, CDCl<sub>3</sub>):  $\delta$  1.55-1.87 (m, 6 H, CH<sub>2</sub>), 2.44 (ddd,  $J$  = 10.8, 8.2, 3.9 Hz, 1 H, CHCO), 4.22 (brs, 1 H, CHOH), 4.40-4.45 (m, 3 H, CH<sub>2</sub>Ph, CHOH), 6.26 (brs, 1 H, CONH), 7.14-7.50 (m, 5 H, Ar-H); <sup>13</sup>C NMR (100 MHz, CDCl<sub>3</sub>):  $\delta$  22.1, 27.6, 34.3, 43.4, 49.9, 74.1, 127.6, 127.7, 128.8, 137.9, 175.0; HRMS (EI): C<sub>13</sub>H<sub>18</sub>NO<sub>2</sub> [M + H]<sup>+</sup> calculated: 220.1338, found: 220.1330.

**(±)-*cis*-Dimethyl-3-(benzylcarbamoyl)-4-hydroxycyclopentane-1,1-dicarboxylate**

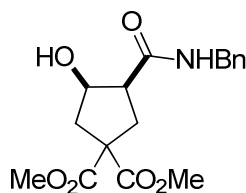

According to GP I, the racemic  $\beta$ -lactone (100 mg, 0.43 mmol) and benzylamine (93 mg, 0.86 mmol) in THF (3 mL) were stirred at room temperature for 72 h. The title compound was isolated by flash column chromatography ( $\text{SiO}_2$ ; pentane/EtOAc, 70:30) as pale yellow coloured oil (129 mg, 88%). IR (neat,  $\text{cm}^{-1}$ ): 3403, 2954, 1734, 1638, 1182;  $^1\text{H}$  NMR (400 MHz,  $\text{CDCl}_3$ ):  $\delta$  2.29 (dd,  $J = 14.5, 4.3$  Hz, 1 H,  $\text{CHCO}$ ), 2.64-2.81 (m, 2 H,  $\text{CHH}$ ), 2.49-2.63 (m, 2 H,  $\text{CHH}$ ), 3.70 (s, 3 H,  $\text{CH}_3$ ), 3.74 (s, 3 H,  $\text{CH}_3$ ), 4.35 (brs, 1 H,  $\text{CHOH}$ ), 4.42 (d,  $J = 3.2$  Hz, 1 H,  $\text{CHHPh}$ ), 4.44 (d,  $J = 3.2$  Hz, 1 H,  $\text{CHHPh}$ ), 4.45-4.47 (m, 1 H,  $\text{CHOH}$ ), 6.60 (virtual t,  $J = 5.9$  Hz, 1 H,  $\text{CONH}$ ), 7.16-7.44 (m, 5 H, Ar-H);  $^{13}\text{C}$  NMR (100 MHz,  $\text{CDCl}_3$ ):  $\delta$  35.6, 42.7, 43.5, 49.4, 53.1, 58.4, 73.5, 127.7, 127.8, 128.8, 137.8, 172.3, 172.9, 173.0; HRMS (ESI):  $\text{C}_{17}\text{H}_{21}\text{NO}_6$   $[\text{M} + \text{Na}]^+$  calculated: 358.1267, found: 358.1278.

**(±)-*cis*-*N*-Benzyl-4-hydroxytetrahydrofuran-3-carboxamide**

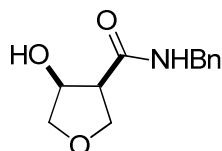

According to GP I, the racemic  $\beta$ -lactone (100 mg, 0.87 mmol) and benzylamine (185 mg, 1.75 mmol) in THF (3 mL) were stirred at room temperature for 72 h. The title compound was isolated by flash column chromatography ( $\text{SiO}_2$ ; pentane/EtOAc, 20:80) as a cream coloured solid (169 mg, 88%). Mp: 114-118  $^\circ\text{C}$ ; IR (KBr,  $\text{cm}^{-1}$ ): 3406, 1642, 1473, 1226, 1122;  $^1\text{H}$  NMR (400 MHz,  $\text{CHCl}_3$ ):  $\delta$  2.90 (ddd,  $J = 14.0, 9.0, 5.0$  Hz, 1 H,  $\text{CHCO}$ ), 3.87-3.91 (m, 2 H,  $\text{CH}_2$ ), 4.09 (d,  $J = 9.0$  Hz, 2 H,  $\text{CH}_2$ ), 4.29 (d,  $J = 3.9$  Hz, 1 H,  $\text{CHOH}$ ), 4.50 (dd,  $J = 14.6, 5.5$  Hz, 1 H,  $\text{CHHPh}$ ), 4.53 (dd,  $J = 14.6, 5.7$  Hz, 1 H,  $\text{CHHPh}$ ), 4.58-4.61 (m, 1 H,  $\text{CHOH}$ ), 6.08 (brs, 1 H,  $\text{CONH}$ ), 7.24-7.40 (m, 5 H, Ar-H);  $^{13}\text{C}$  NMR (100 MHz,  $\text{CDCl}_3$ ):  $\delta$  43.7, 49.3, 69.0, 72.6, 75.9, 127.78, 127.8, 128.8, 128.9, 137.4, 170.96; HRMS (ESI):  $\text{C}_{17}\text{H}_{21}\text{NO}_6$   $[\text{M} + \text{Na}]^+$  calculated: 244.0950, found: 244.0943.

### General procedure for the asymmetric carbonylation of *meso*-epoxides (GP II)

In an oven-dried Schlenk tube, chiral chromium chloride catalyst **1** or **3** (0.005-0.05 mmol) and  $\text{Co}_2(\text{CO})_8$  (0.0075-0.05 mmol) were charged under  $\text{N}_2$  atmosphere. Dry DME (1.5 mL) and the *meso*-epoxide (1.0 mmol) were added and the reaction mixture was degassed by three vacuum/nitrogen cycles. The reaction mixture was injected *via* a syringe into an oven-dried reactor under  $\text{N}_2$ . The reactor was pressurised with CO gas to about 20 psi and vented. Subsequently it was pressurised to 500 psi, placed in an oil bath and heated at 70 °C for 16 h. The reactor was allowed to cool to room temperature and the CO gas was vented off carefully. The reaction mixture was evaporated under reduced pressure and the residue was purified by flash column chromatography to afford the pure  $\beta$ -lactone.

(Conversions in Table 1 and 2 were determined by  $^1\text{H}$  NMR spectroscopy of the aforementioned residue before purification by flash column chromatography. The  $\beta$ -lactone product was the only observable compound for conversions of  $\geq 98\%$ . In all other cases (Table 1 and Table 2, entries 1, 15 and 16), the starting *meso*-epoxide and the  $\beta$ -lactone product were the only detectable components.)

#### *trans*-3,4-Bis(benzyloxymethyl)oxetan-2-one<sup>10</sup>

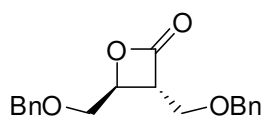

According to the GP II using catalyst **1** (32 mg, 0.05 mmol),  $\text{Co}_2(\text{CO})_8$  (17 mg, 0.05 mmol), *cis*-1,4-dibenzyloxy-2,3-epoxybutane (284 mg, 1.0 mmol) and DME (1.5 mL). Purification by flash column chromatography ( $\text{SiO}_2$ ; pentane/ $\text{Et}_2\text{O}$ , 90:10) gave the title compound as a white solid (152 mg, 49%). Enantiomeric excess was determined by HPLC analysis (CHIRALPAK IB, *n*-heptane/ $\text{EtOH}$ , 90:10, 1.0 mL/min, 210 nm):  $t_r$  (minor) = 9.8 min;  $t_r$  (major) = 14.4 min: 19% *ee*;  $[\alpha]_D^{20} = +9.1$  (*c* 1.0,  $\text{CHCl}_3$ ).



According to the GP II using catalyst **3** (6.2 mg, 0.005 mmol), Co<sub>2</sub>(CO)<sub>8</sub> (2.6 mg, 0.0075 mmol), *cis*-1,4-dibenzyloxy-2,3-epoxybutane (284 mg, 1.0 mmol) and DME (1.5 mL). Purification by flash column chromatography (SiO<sub>2</sub>; pentane/Et<sub>2</sub>O, 90:10) gave the title compound as a white solid (174 mg, 56%). Enantiomeric excess was determined by HPLC analysis (CHIRALPAK IB, *n*-heptane/EtOH, 90:10, 1.0 mL/min, 210 nm): *t<sub>r</sub>* (minor) = 9.7 min; *t<sub>r</sub>* (major) = 13.4 min: 13% *ee*; [α]<sub>D</sub><sup>20</sup> = +3.9 (*c* 1.0, CHCl<sub>3</sub>).

***trans*-9-Oxabicyclo[6.2.0]dec-4-en-10-one<sup>10</sup>**

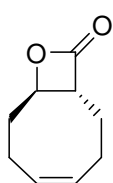

According to GP II using catalyst **1** (32 mg, 0.05 mmol), Co<sub>2</sub>(CO)<sub>8</sub> (17 mg, 0.05 mmol), epoxide (124 mg, 1.0 mmol), and DME (1.5 mL). Purification by flash column chromatography (SiO<sub>2</sub>; pentane/Et<sub>2</sub>O, 90:10) gave the title compound as colourless oil (126 mg, 82%). Enantiomeric excess was determined by HPLC analysis after derivatisation into the β-hydroxy benzylamide (CHIRALPAK IB, *n*-heptane/EtOH, 97:3, 1.0 mL/min, 210 nm): *t<sub>r</sub>* (minor) = 14.2 min; *t<sub>r</sub>* (major) = 15.5 min: 6% *ee*; [α]<sub>D</sub><sup>20</sup> = +4.1 (*c* 1.0, CHCl<sub>3</sub>); [α]<sub>D</sub><sup>20</sup> (benzylamide) = +4.6 (*c* 1.0, CHCl<sub>3</sub>).

According to GP II using catalyst **3** (6.1 mg, 0.05 mmol), Co<sub>2</sub>(CO)<sub>8</sub> (2.5 mg, 0.075 mmol), epoxide (124 mg, 1.0 mmol) and DME (1.5 mL) were used in the reaction. Purification by flash column chromatography (SiO<sub>2</sub>; pentane/Et<sub>2</sub>O, 90:10) gave the title compound as colourless oil (130 mg, 85%). Enantiomeric excess was determined by HPLC analysis after derivatisation into the β-hydroxy benzylamide (CHIRALPAK IB, *n*-heptane/EtOH, 90:10, 1.0 mL/min, 210 nm); *t<sub>r</sub>* (minor) = 13.7 min; *t<sub>r</sub>* (major) = 15.3 min: 2% *ee*. [α]<sub>D</sub><sup>20</sup> = +2.4 (*c* 1.0, CHCl<sub>3</sub>); [α]<sub>D</sub><sup>20</sup> (benzylamide) = +2.8 (*c* 1.0, CHCl<sub>3</sub>).

***trans*-9-oxabicyclo[6.2.0]decan-10-one<sup>10</sup>**

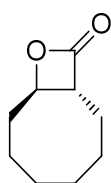

According to GP II using catalyst **1** (32 mg, 0.05 mmol), Co<sub>2</sub>(CO)<sub>8</sub> (17 mg, 0.05 mmol), epoxide (126 mg, 1.0 mmol) and DME (1.5 mL). Purification by flash column chromatography (SiO<sub>2</sub>; pentane/Et<sub>2</sub>O, 90:10) gave the title compound as colourless oil (127 mg, 83%). Enantiomeric excess was determined by HPLC analysis after derivatisation into the β-hydroxy benzylamide (CHIRALPAK IB, *n*-heptane/EtOH, 90:10, 1.0 mL/min, 210 nm): *t<sub>r</sub>* (minor) = 14.8 min; *t<sub>r</sub>* (major) = 15.8 min: 11% *ee*; [α]<sub>D</sub><sup>20</sup> = +5.4 (*c* 1.0, CHCl<sub>3</sub>); [α]<sub>D</sub><sup>20</sup> (benzylamide) = +5.7 (*c* 1.0, CHCl<sub>3</sub>).

According to GP II using catalyst **3** (6.1 mg, 0.005 mmol), Co<sub>2</sub>(CO)<sub>8</sub> (2.5 mg, 0.0075 mmol), epoxide (126 mg, 1.0 mmol) and DME (1.5 mL). Purification by flash column chromatography (SiO<sub>2</sub>; pentane/Et<sub>2</sub>O, 90:10) gave the title compound as colourless oil (145 mg, 94%). Enantiomeric excess was determined by HPLC analysis after derivatisation into the β-hydroxy benzylamide (CHIRALPAK IB, *n*-heptane/EtOH, 90:10, 1.0 mL/min, 210 nm): *t<sub>r</sub>* (major) = 14.6 min; *t<sub>r</sub>* (minor) = 15.7 min: 6% *ee*; [α]<sub>D</sub><sup>20</sup> = -3.1 (*c* 1.0, CHCl<sub>3</sub>); [α]<sub>D</sub><sup>20</sup> (benzylamide) = -3.4 (*c* 1.0, CHCl<sub>3</sub>).

***trans*-13-Oxabicyclo[10.2.0]tetradecan-14-one<sup>10</sup>**

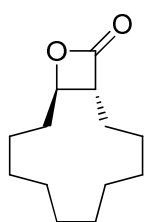

According to the GP II using catalyst **1** (32 mg, 0.05 mmol), Co<sub>2</sub>(CO)<sub>8</sub> (17 mg, 0.05 mmol), epoxide (182 mg, 1.0 mmol) and DME (1.5 mL). Purification by flash column chromatography (SiO<sub>2</sub>; pentane/Et<sub>2</sub>O, 90:10) gave the title compound as colourless oil (180 mg, 86%). Enantiomeric excess was determined by HPLC analysis after derivatisation into the β-hydroxy benzylamide (CHIRALPAK IB, *n*-heptane/EtOH, 97:3, 1.0 mL/min, 210 nm): *t<sub>r</sub>* (major) = 10.4 min; *t<sub>r</sub>* (minor) = 11.2 min: 13% *ee*; [α]<sub>D</sub><sup>20</sup> = +3.3 (*c* 1.0, CHCl<sub>3</sub>); [α]<sub>D</sub><sup>20</sup> (benzylamide) = +3.8 (*c* 1.0, CHCl<sub>3</sub>).

According to the GP II using catalyst **3** (6.1 mg, 0.005 mmol), Co<sub>2</sub>(CO)<sub>8</sub> (2.5 mg, 0.0075 mmol), epoxide (182 mg, 1.0 mmol) and DME (1.5 mL). Purification by flash column chromatography (SiO<sub>2</sub>; pentane/Et<sub>2</sub>O, 90:10) gave the title compound as colourless oil (149 mg, 71%). Enantiomeric excess was determined by HPLC analysis after derivatisation into the β-hydroxy benzylamide (CHIRALPAK IB, *n*-heptane/EtOH, 90:10, 1.0 mL/min, 210 nm): *t<sub>r</sub>* (major) = 10.5 min; *t<sub>r</sub>* (minor) = 11.2 min: 11% *ee*; [α]<sub>D</sub><sup>20</sup> = +2.8 (*c* 1.0, CHCl<sub>3</sub>); [α]<sub>D</sub><sup>20</sup> (benzylamide) = +3.1 (*c* 1.0, CHCl<sub>3</sub>).

***trans*-8-oxabicyclo[5.2.0]nonan-9-one<sup>10</sup>**

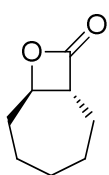

According to GP II using catalyst **1** (32 mg, 0.05 mmol), Co<sub>2</sub>(CO)<sub>8</sub> (17 mg, 0.05 mmol), epoxide (112 mg, 1.0 mmol) and DME (1.5 mL). Purification by flash column chromatography (SiO<sub>2</sub>; pentane/Et<sub>2</sub>O, 90:10) gave the title compound as colourless oil (127 mg, 91%). Enantiomeric excess was determined by HPLC analysis after derivatisation into the β-hydroxy benzylamide (CHIRALPAK IB, *n*-heptane/EtOH, 95:5, 1.0 mL/min, 210 nm): *t<sub>r</sub>* (major) = 10.1 min; *t<sub>r</sub>* (minor) = 10.9 min: 4% *ee*; [α]<sub>D</sub><sup>20</sup> = −3.8 (*c* 1.0, CHCl<sub>3</sub>); [α]<sub>D</sub><sup>20</sup> (benzylamide) = −3.1 (*c* 1.0, CHCl<sub>3</sub>).

According to the GP II using catalyst **3** (6.1 mg, 0.005 mmol), Co<sub>2</sub>(CO)<sub>8</sub> (2.5 mg, 0.0075 mmol), epoxide (112 mg, 1.0 mmol) and DME (1.5 mL). Purification by flash column chromatography (SiO<sub>2</sub>; pentane/Et<sub>2</sub>O, 90:10) gave the title compound as colourless oil (114 mg, 81%). Enantiomeric excess was determined by HPLC analysis after derivatisation into the β-hydroxy benzylamide (CHIRALPAK IB, *n*-heptane/EtOH, 95:5, 1.0 mL/min, 210 nm): *t<sub>r</sub>* (major) = 10.0 min; *t<sub>r</sub>* (minor) = 10.7 min: 16% *ee*; [α]<sub>D</sub><sup>20</sup> = −5.7 (*c* 1.0, CHCl<sub>3</sub>); [α]<sub>D</sub><sup>20</sup> (benzylamide) = −6.1 (*c* 1.0, CHCl<sub>3</sub>).

**(-)-(1S,2R)-6-Oxabicyclo[3.2.0]heptan-7-one<sup>10, 13</sup>**

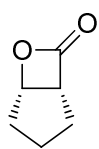

According to the GP II using catalyst **1** (32 mg, 0.05 mmol),  $\text{Co}_2(\text{CO})_8$  (17 mg, 0.05 mmol) epoxide (84 mg, 1.0 mmol) and DME (1.5 mL). Purification by flash column chromatography ( $\text{SiO}_2$ ; pentane/ $\text{Et}_2\text{O}$ , 90:10) gave the title compound as colourless oil (100 mg, 89%). Enantiomeric excess was determined by HPLC analysis after derivatisation into the  $\beta$ -hydroxy benzylamide (CHIRALPAK IB, *n*-heptane/ $\text{EtOH}$ , 98:2, 1.0 mL/min, 210 nm):  $t_r$  (major) = 48.2 min;  $t_r$  (minor) = 51.9 min: 40% *ee*;  $[\alpha]_D^{20} = -6.7$  (*c* 1.0,  $\text{CHCl}_3$ );  $[\alpha]_D^{20}$  (benzylamide) =  $-7.2$  (*c* 1.0,  $\text{CHCl}_3$ ).

According to the GP II using catalyst **3** (6.0 mg, 0.005 mmol),  $\text{Co}_2(\text{CO})_8$  (2.5 mg, 0.0075 mmol), epoxide (84 mg, 1.0 mmol) and DME (1.5 mL). Purification by flash column chromatography ( $\text{SiO}_2$ ; pentane/ $\text{Et}_2\text{O}$ , 90:10) gave the title compound as colourless oil (93 mg, 83%). Enantiomeric excess was determined by HPLC analysis after derivatisation into the  $\beta$ -hydroxy benzylamide (CHIRALPAK IB, *n*-heptane/ $\text{EtOH}$ , 98:2, 1.0 mL/min, 210 nm):  $t_r$  (major) = 48.3 min;  $t_r$  (minor) = 51.8: 33% *ee*;  $[\alpha]_D^{20} = -4.3$  (*c* 1.0,  $\text{CHCl}_3$ );  $[\alpha]_D^{20}$  (benzylamide) =  $-4.8$  (*c* 1.0,  $\text{CHCl}_3$ ).

**(+)-(1R,2S)-Dimethyl-7-oxo-6-oxabicyclo[3.2.0]heptane-3,3-dicarboxylate<sup>10, 14</sup>**

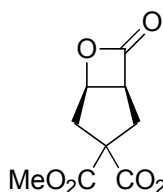

According to the GP II using catalyst **1** (32 mg, 0.05 mmol),  $\text{Co}_2(\text{CO})_8$  (17 mg, 0.05 mmol), epoxide (200 mg, 1.0 mmol) and DME (1.5 mL). Purification by flash column chromatography ( $\text{SiO}_2$ ; pentane/ $\text{EtOAc}$ , 50:50) gave the title compound as colourless oil (177 mg, 78%). Enantiomeric excess was determined by HPLC analysis after derivatisation into the  $\beta$ -hydroxy benzylamide (CHIRALPAK IB, *n*-heptane/ $\text{EtOH}$ , 93:7, 0.5 mL/min, 210 nm):  $t_r$  (major) = 48.2 min;  $t_r$  (minor) = 50.4 min: 45% *ee*;  $[\alpha]_D^{20} = +14.7$  (*c* 1.0,  $\text{CHCl}_3$ );  $[\alpha]_D^{20}$  (benzylamide) =  $+15.1$  (*c* 1.0,  $\text{CHCl}_3$ ).

According to the GP II using catalyst **3** (24 mg, 0.02 mmol),  $\text{Co}_2(\text{CO})_8$  (11 mg, 0.03 mmol), epoxide (200 mg, 1.0 mmol) and DME (1.5 mL). Purification by flash column chromatography ( $\text{SiO}_2$ ; pentane/EtOAc, 50:50) gave the title compound as colourless oil (189 mg, 83%). Enantiomeric excess was determined by HPLC analysis after derivatisation into the  $\beta$ -hydroxy benzylamide (CHIRALPAK IB, *n*-heptane/EtOH, 93:7, 0.5 mL/min, 210 nm):  $t_r$  (major) = 47.0 min;  $t_r$  (minor) = 49.5 min: 41% *ee*;  $[\alpha]_D^{20} = +12.9$  (*c* 1.0,  $\text{CHCl}_3$ );  $[\alpha]_D^{20}$  (benzylamide) = +13.3 (*c* 1.0,  $\text{CHCl}_3$ ).

**(-)-(1*R*,2*S*)-3,6-dioxabicyclo[3.2.0]heptan-7-one<sup>10,13</sup>**

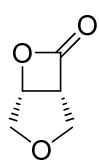

According to the GP II using catalyst **1** (32 mg, 0.05 mmol),  $\text{Co}_2(\text{CO})_8$  (17 mg, 0.05 mmol), epoxide (86 mg, 1.0 mmol) and DME (1.5 mL). Purification by flash column chromatography ( $\text{SiO}_2$ ; pentane/ $\text{Et}_2\text{O}$ , 50:50) gave the title compound as colourless oil (106 mg, 93%). Enantiomeric excess was determined by HPLC analysis after derivatisation into the  $\beta$ -hydroxy benzylamide (CHIRALPAK IB, *n*-heptane/EtOH, 90:10, 1 mL/min, 210 nm):  $t_r$  (minor) = 15.1;  $t_r$  (major) = 16.4 min: 56% *ee*;  $[\alpha]_D^{20} = -5.8$  (*c* 1.0,  $\text{CHCl}_3$ );  $[\alpha]_D^{20}$  (benzylamide) = -6.2 (*c* 1.0,  $\text{CHCl}_3$ ).

According to the GP II using catalyst **3** (6.1 mg, 0.005 mmol),  $\text{Co}_2(\text{CO})_8$  (2.5 mg, 0.0075 mmol), epoxide (86 mg, 1.0 mmol) and DME (1.5 mL). Purification by flash column chromatography ( $\text{SiO}_2$ ; pentane/ $\text{Et}_2\text{O}$ , 50:50) gave the title compound as colourless oil (98 mg, 86%). Enantiomeric excess was determined by HPLC analysis after derivatisation into the  $\beta$ -hydroxy benzylamide (CHIRALPAK IB, *n*-heptane/EtOH, 90:10, 1 mL/min, 210 nm):  $t_r$  (minor) = 15.3;  $t_r$  (major) = 16.4 min: 33% *ee*;  $[\alpha]_D^{20} = -4.1$  (*c* 1.0,  $\text{CHCl}_3$ );  $[\alpha]_D^{20}$  (benzylamide) = -4.5 (*c* 1.0,  $\text{CHCl}_3$ ).

***trans*-4-Tosyl-8-oxa-4-azabicyclo[5.2.0]nonan-9-one<sup>10</sup>**

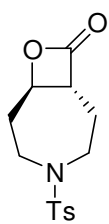

According to the GP II using catalyst **1** (32 mg, 0.05 mmol), Co<sub>2</sub>(CO)<sub>8</sub> (17 mg, 0.05 mmol), epoxide (267 mg, 1.0 mmol) and DME (1.5 mL). Purification by flash column chromatography (SiO<sub>2</sub>; pentane/EtOAc, 90:10) gave the title compound as a white solid (138 mg, 47%). Enantiomeric excess was determined by HPLC analysis (CHIRALPAK IB, *n*-heptane/EtOH, 90:10, 0.5 mL/min, 230 nm): *t<sub>r</sub>* (major) = 50.9 min; *t<sub>r</sub>* (minor) = 53.2 min: 31% *ee*; [α]<sub>D</sub><sup>20</sup> = +8.1 (*c* 1.0, CHCl<sub>3</sub>).

According to the GP II using catalyst **3** (24 mg, 0.02 mmol), Co<sub>2</sub>(CO)<sub>8</sub> (10 mg, 0.03 mmol), epoxide (267 mg, 1.0 mmol) and DME (1.5 mL). Purification by flash column chromatography (SiO<sub>2</sub>; pentane/EtOAc, 90:10) gave the title compound as a white solid (165 mg, 56%). Enantiomeric excess was determined by HPLC analysis (CHIRALPAK IB, *n*-heptane/EtOH, 90:10, 0.5 mL/min, 230 nm): *t<sub>r</sub>* (minor) = 52.0 min; *t<sub>r</sub>* (major) = 54.5 min: 31% *ee*; [α]<sub>D</sub><sup>20</sup> = −6.7 (*c* 1.0, CHCl<sub>3</sub>).

## References

1. S. A. Kozmin, T. Iwama, Y. Huang and V. H. Rawal, *J. Am. Chem. Soc.*, 2002, **124**, 4628-4641.
2. A. Berkessel, E. Ertürk and C. Laporte, *Adv. Synth. Catal.*, 2006, **348**, 223-228.
3. D. M. Hodgson, J.-M. Galano and M. Christlieb, *Tetrahedron*, 2003, **59**, 9719-9728.
4. K. J. Shea and J. S. Kim, *J. Am. Chem. Soc.*, 1992, **114**, 3044-3051.
5. Y. Belokon, D. Chusov, A. Peregudov, L. Yashkina, G. Timofeeva, V. Maleev, M. North and H. Kagan, *Adv. Synth. Catal.*, 2009, **351**, 3157-3167.
6. P. G. Gassman and L. M. Haberman, *The Journal of Organic Chemistry*, 1986, **51**, 5010-5013.
7. P. E. Sonnet, *The Journal of Organic Chemistry*, 1980, **45**, 154-157.
8. F. Xue and C. T. Seto, *Biorg. Med. Chem.*, 2006, **14**, 8467-8487.
9. H. Ji, B. Z. Stanton, J. Igarashi, H. Li, P. Martajsek, L. J. Roman, T. L. Poulos and R. B. Silverman, *J. Am. Chem. Soc.*, 2008, **130**, 3900-3914.
10. P. Ganji, D. J. Doyle and H. Ibrahim, *Org. Lett.*, 2011, **13**, 3142-3145.
11. A. A. Scholte, M. H. An and M. L. Snapper, *Org. Lett.*, 2006, **8**, 4759-4762.
12. M. Quirós, F. Rebolledo and V. Gotor, *Tetrahedron: Asymmetry*, 1999, **10**, 473-486.
13. G. S. Cortez, R. L. Tennyson and D. Romo, *J. Am. Chem. Soc.*, 2001, **123**, 7945-7946.
14. S. H. Oh, G. S. Cortez and D. Romo, *J. Org. Chem.*, 2005, **70**, 2835-2838.

**(±)-*trans*-3,4-Bis((benzyloxy)methyl)oxetan-2-one (racemic)**

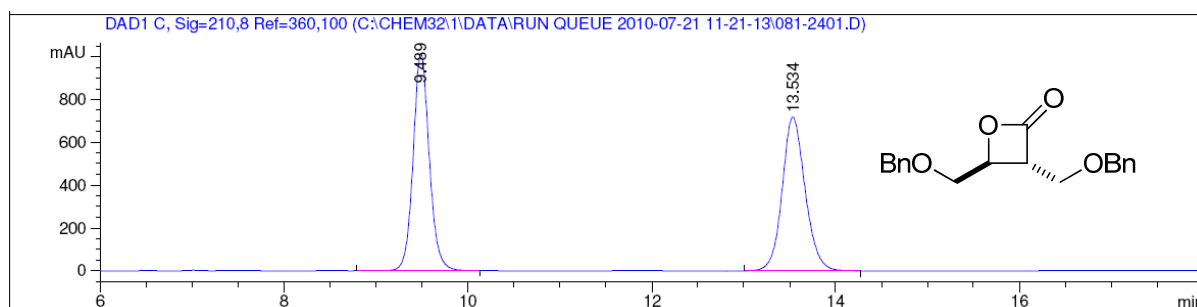

Signal 2: DAD1 C, Sig=210,8 Ref=360,100

| Peak # | RetTime [min] | Type | Width [min] | Area [mAU*s] | Height [mAU] | Area %  |
|--------|---------------|------|-------------|--------------|--------------|---------|
| 1      | 9.489         | BB   | 0.1870      | 1.24438e4    | 1015.25397   | 49.9142 |
| 2      | 13.534        | BB   | 0.2646      | 1.24865e4    | 718.91705    | 50.0858 |

Totals : 2.49303e4 1734.17102

**(+)-*trans*-3,4-Bis((benzyloxy)methyl)oxetan-2-one with catalyst 1 ( 19% ee)**

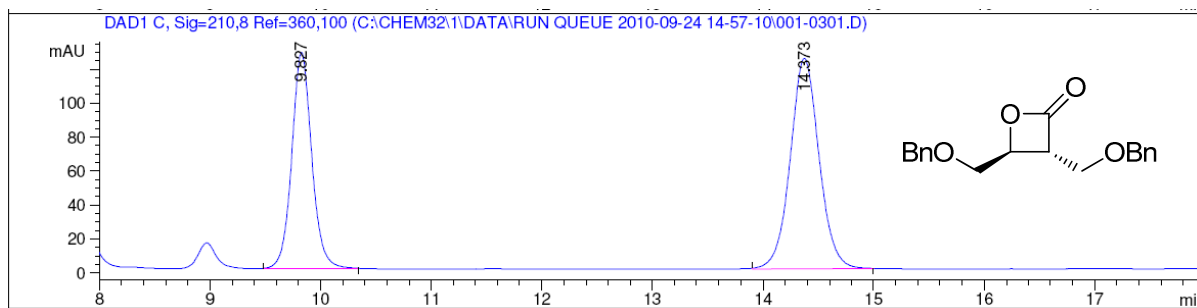

| Peak # | RetTime [min] | Type | Width [min] | Area [mAU*s] | Height [mAU] | Area %  |
|--------|---------------|------|-------------|--------------|--------------|---------|
| 1      | 9.827         | BB   | 0.1838      | 28.32489     | 2.36381      | 40.7463 |
| 2      | 14.373        | BB   | 0.2732      | 41.19036     | 2.34132      | 59.2537 |

Totals : 69.51525 4.70512



**(+)-*trans*-3,4-Bis((benzyloxy)methyl)oxetan-2-one with catalyst 3 (13% *ee*)**

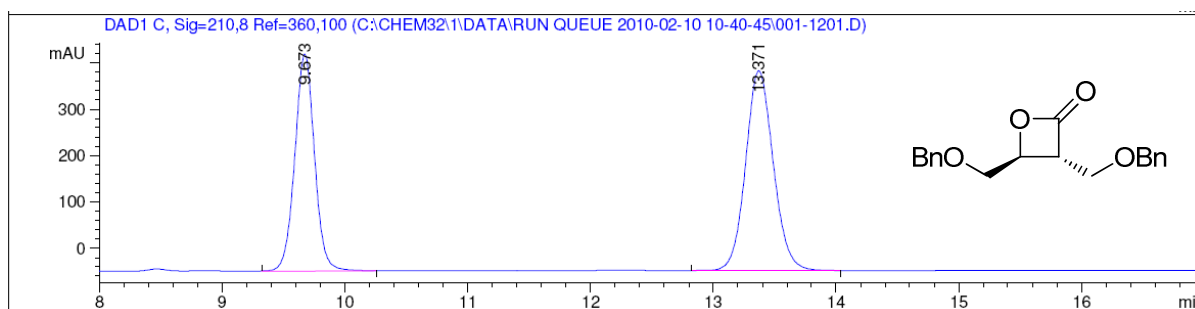

Signal 2: DAD1 C, Sig=210,8 Ref=360,100

| Peak # | RetTime [min] | Type | Width [min] | Area [mAU*s] | Height [mAU] | Area %  |
|--------|---------------|------|-------------|--------------|--------------|---------|
| 1      | 9.673         | BB   | 0.1724      | 5236.38818   | 468.58530    | 43.5183 |
| 2      | 13.371        | BB   | 0.2416      | 6796.21875   | 431.76999    | 56.4817 |

Totals : 1.20326e4 900.35529

(±)-*trans*-*N*-Benzyl-8-hydroxycyclooct-4-enecarboxamide

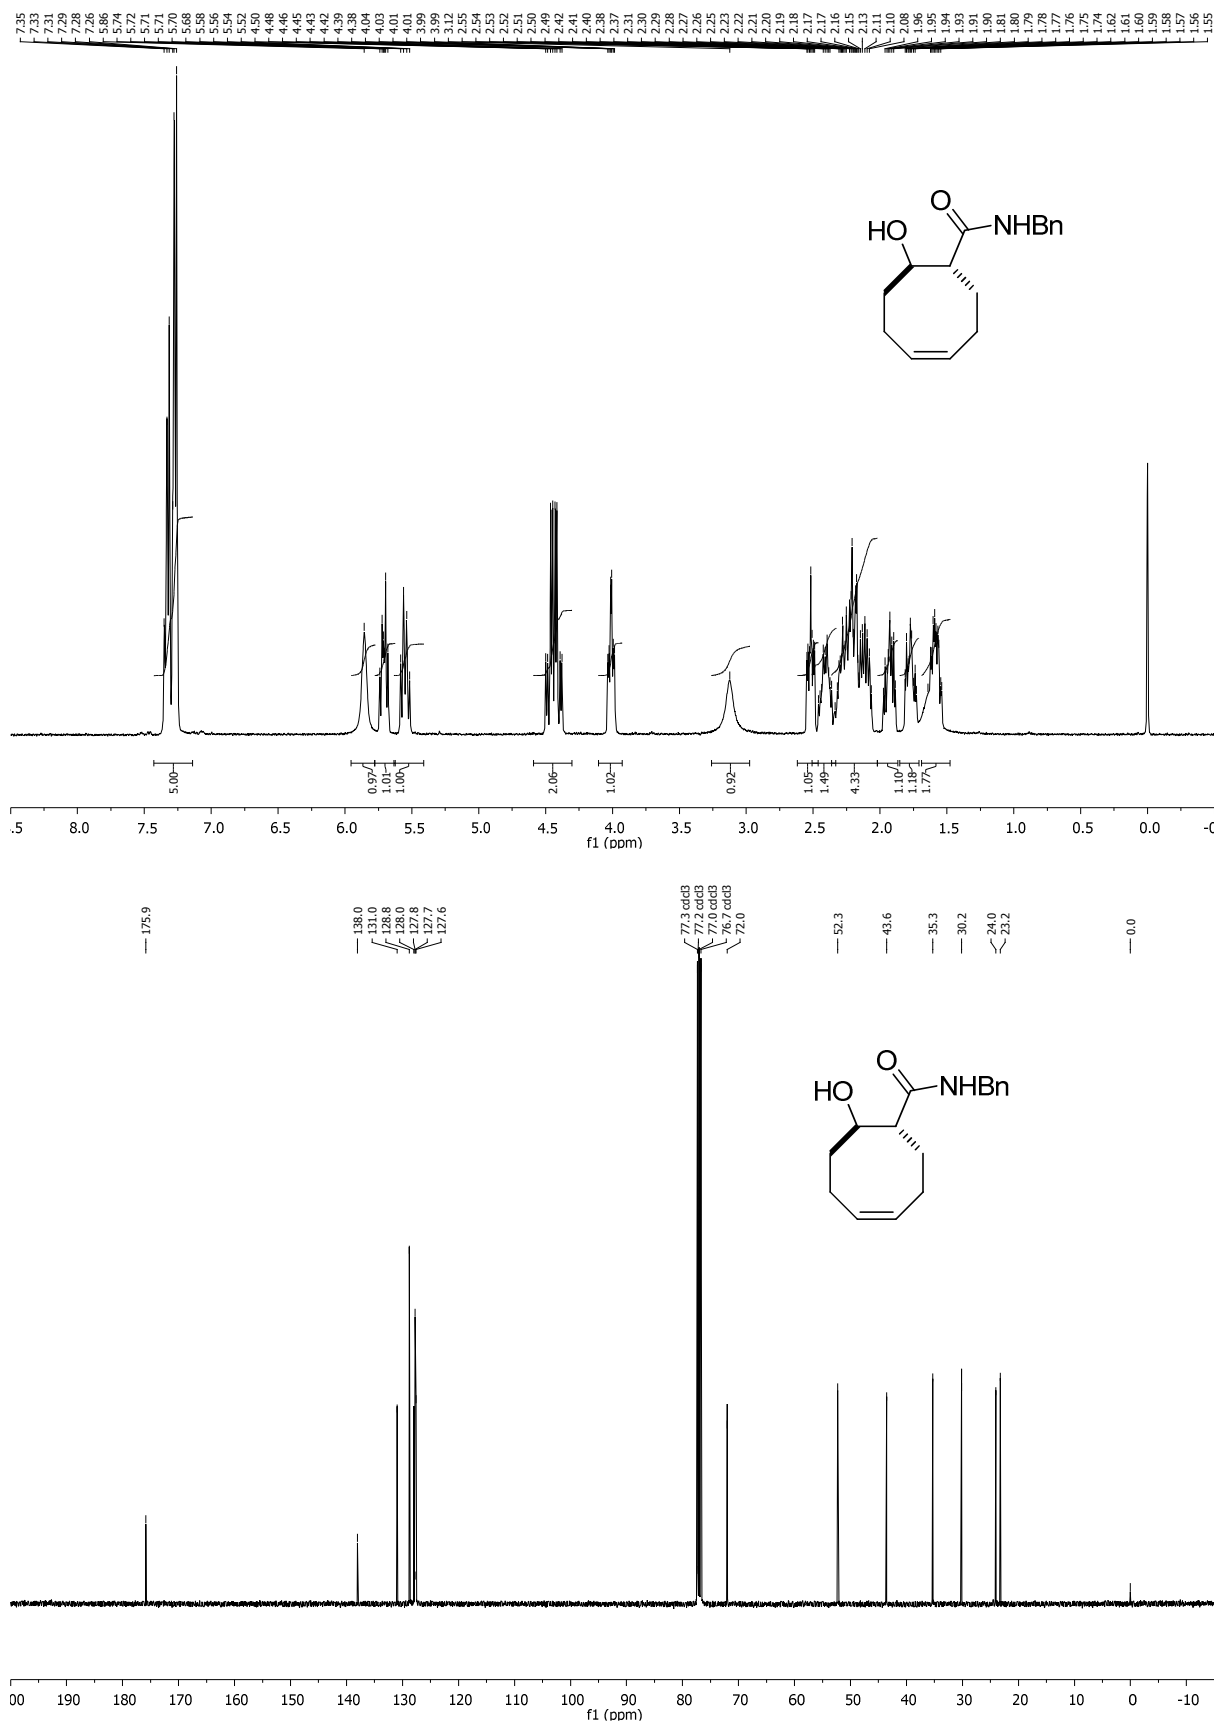

**(±)-*trans*-N-Benzyl-8-hydroxycyclooct-4-enecarboxamide (racemic)**

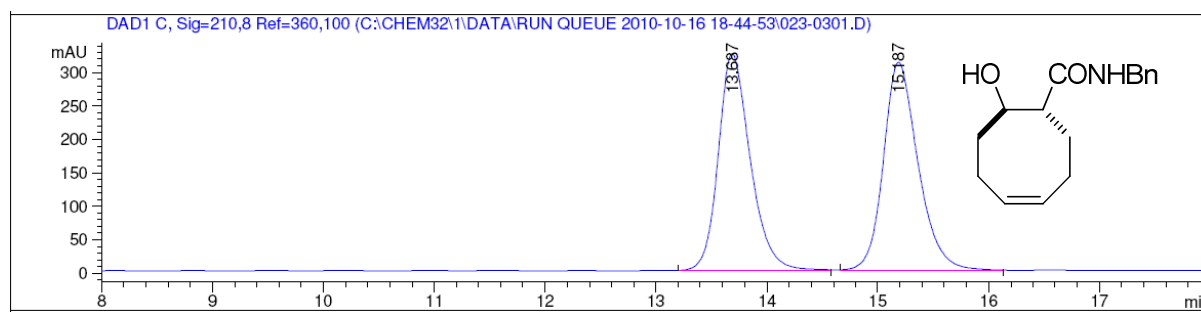

Signal 2: DAD1 C, Sig=210,8 Ref=360,100

| Peak # | RetTime [min] | Type | Width [min] | Area [mAU*s] | Height [mAU] | Area %  |
|--------|---------------|------|-------------|--------------|--------------|---------|
| 1      | 13.687        | BB   | 0.2976      | 86.84924     | 4.49182      | 49.2388 |
| 2      | 15.187        | BB   | 0.3132      | 89.53459     | 4.29510      | 50.7612 |

Totals : 176.38383 8.78692

**(+)-*trans*-N-Benzyl-8-hydroxycyclooct-4-enecarboxamide with catalyst 1 (6% ee)**

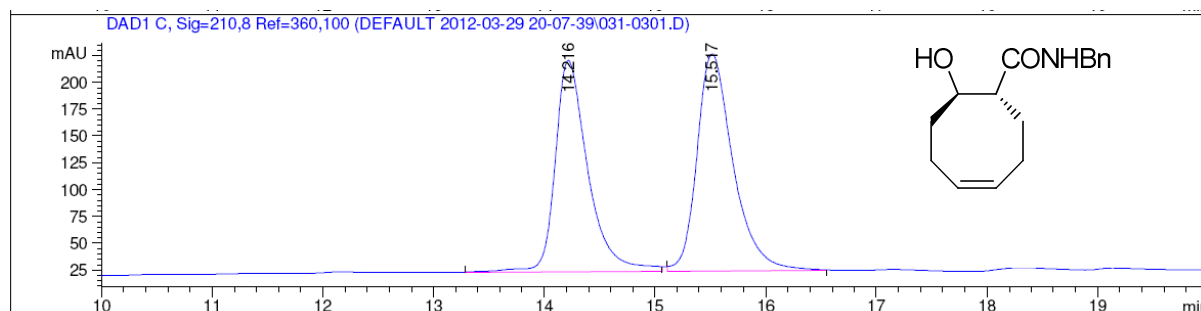

Signal 2: DAD1 C, Sig=210,8 Ref=360,100

| Peak # | RetTime [min] | Type | Width [min] | Area [mAU*s] | Height [mAU] | Area %  |
|--------|---------------|------|-------------|--------------|--------------|---------|
| 1      | 14.216        | BB   | 0.3086      | 4065.42773   | 197.12209    | 46.9809 |
| 2      | 15.517        | BB   | 0.3384      | 4587.92822   | 202.43925    | 53.0191 |

Totals : 8653.35596 399.56134

**(+)-*trans*-N-Benzyl-8-hydroxycyclooct-4-enecarboxamide with catalyst 3 (2% *ee*)**

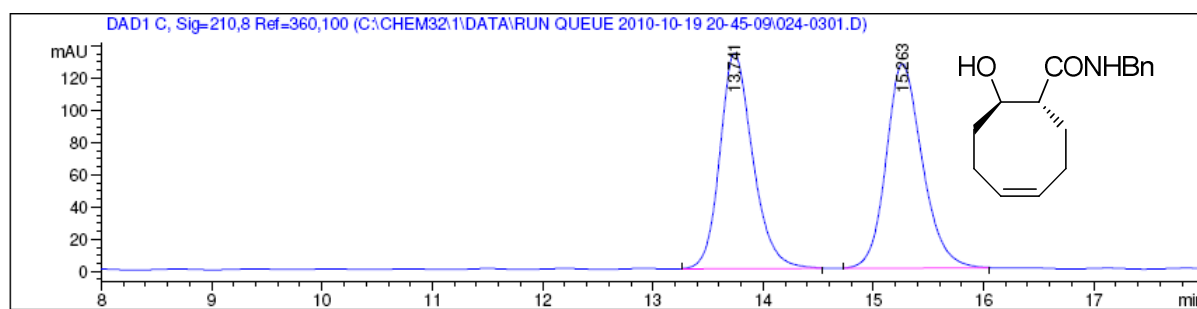

Signal 2: DAD1 C, Sig=210,8 Ref=360,100

| Peak # | RetTime [min] | Type | Width [min] | Area [mAU*s] | Height [mAU] | Area %  |
|--------|---------------|------|-------------|--------------|--------------|---------|
| 1      | 13.741        | BB   | 0.3159      | 2770.30151   | 133.59807    | 48.8746 |
| 2      | 15.263        | BB   | 0.3465      | 2897.87769   | 126.84022    | 51.1254 |

Totals : 5668.17920 260.43829

*trans*-N-Benzyl-2-hydroxycyclododecanecarboxamide

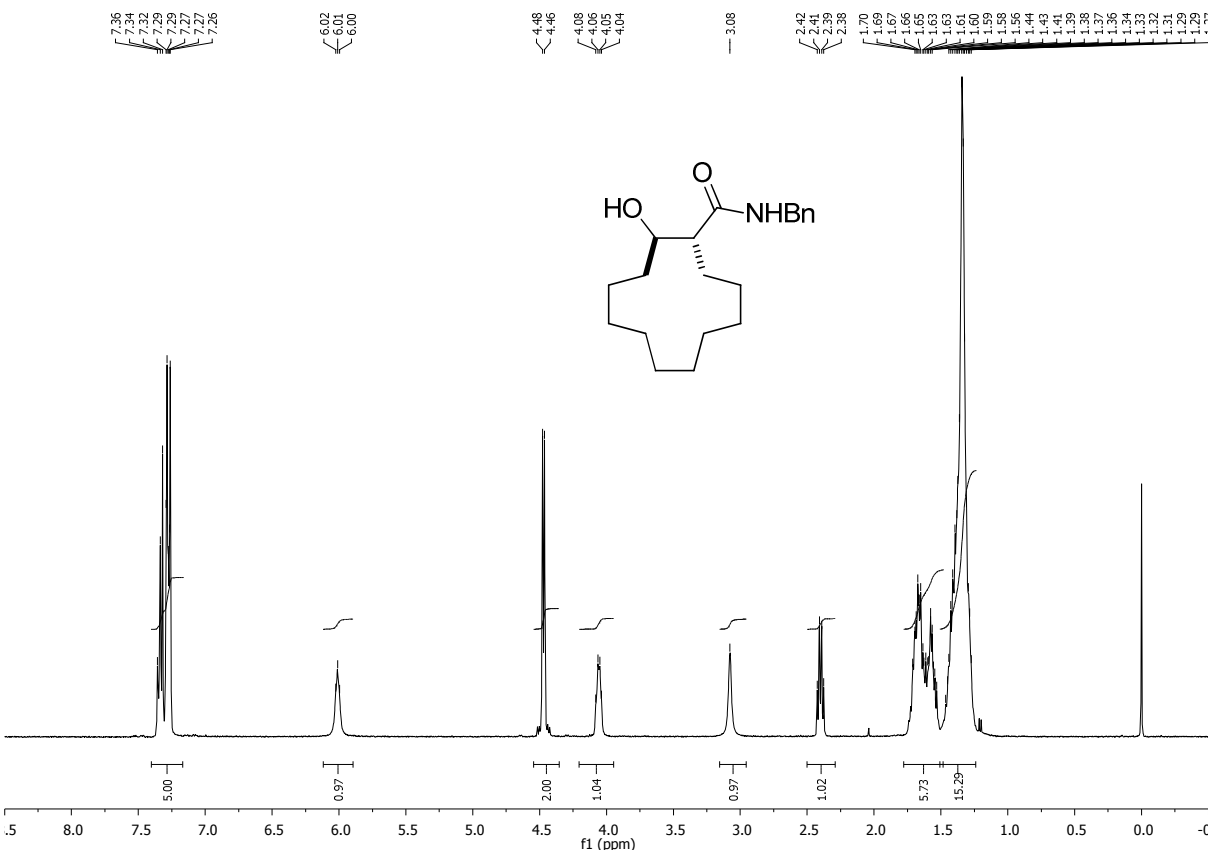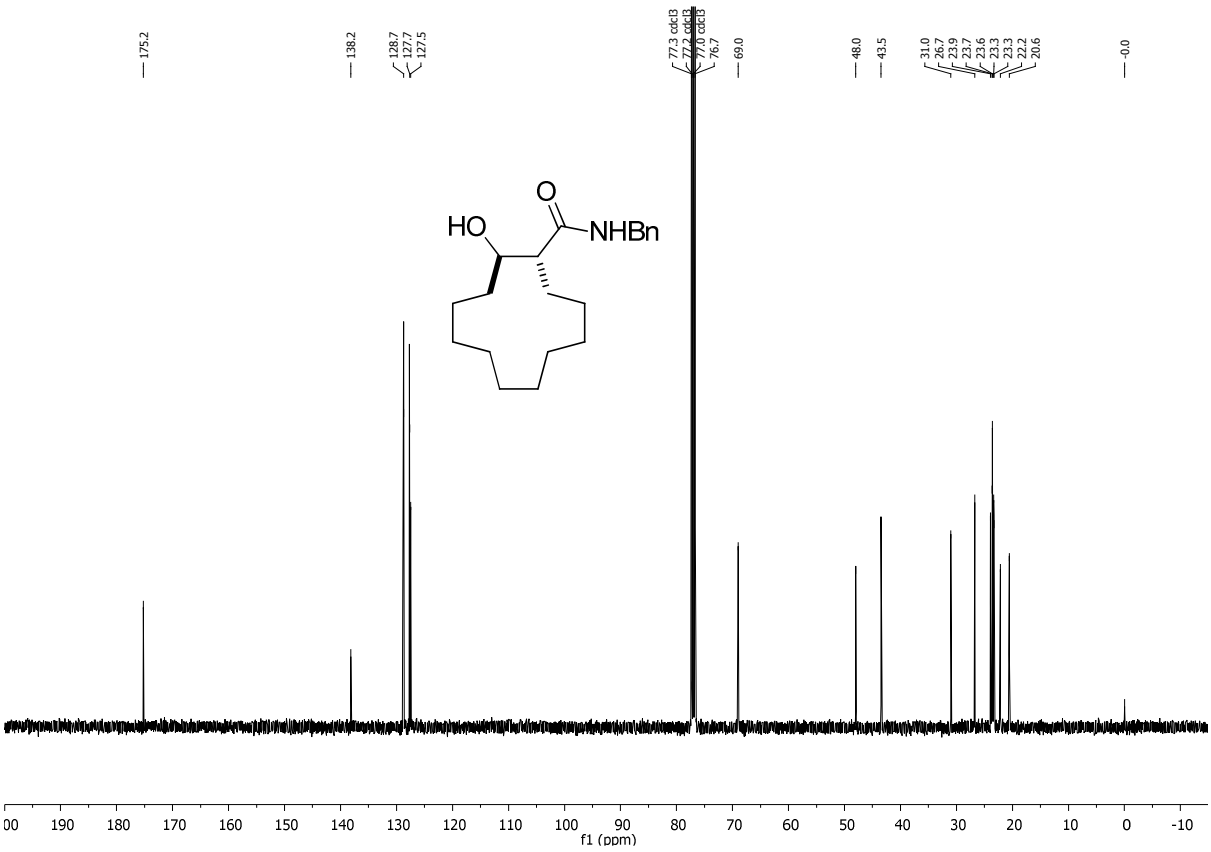

**(±)-*trans*-N-Benzyl-2-hydroxycyclododecanecarboxamide (racemic)**

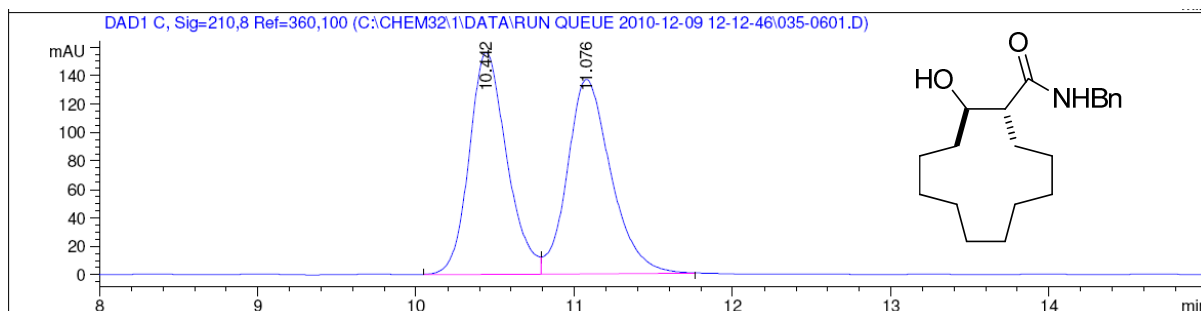

Signal 2: DAD1 C, Sig=210,8 Ref=360,100

| Peak # | RetTime [min] | Type | Width [min] | Area [mAU*s] | Height [mAU] | Area %  |
|--------|---------------|------|-------------|--------------|--------------|---------|
| 1      | 10.442        | BV   | 0.2524      | 2569.92065   | 155.86620    | 49.5552 |
| 2      | 11.076        | VB   | 0.2893      | 2616.05762   | 136.68903    | 50.4448 |

Totals : 5185.97827 292.55522

**(+)-*trans*-N-Benzyl-2-hydroxycyclododecanecarboxamide with catalyst 1 (13% ee)**

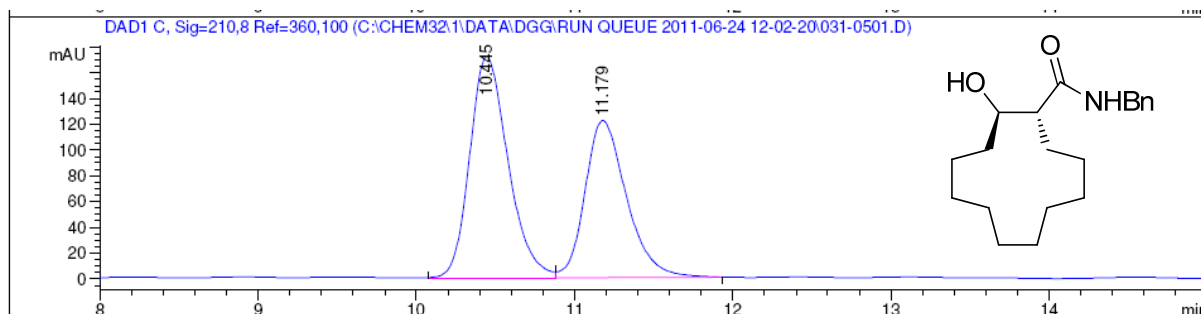

Signal 2: DAD1 C, Sig=210,8 Ref=360,100

| Peak # | RetTime [min] | Type | Width [min] | Area [mAU*s] | Height [mAU] | Area %  |
|--------|---------------|------|-------------|--------------|--------------|---------|
| 1      | 10.445        | BV   | 0.2581      | 2891.17065   | 172.00726    | 56.4455 |
| 2      | 11.179        | VB   | 0.2772      | 2230.88550   | 122.07956    | 43.5545 |

Totals : 5122.05615 294.08682

**(+)-*trans*-N-Benzyl-2-hydroxycyclododecanecarboxamide with catalyst 3 (11% *ee*)**

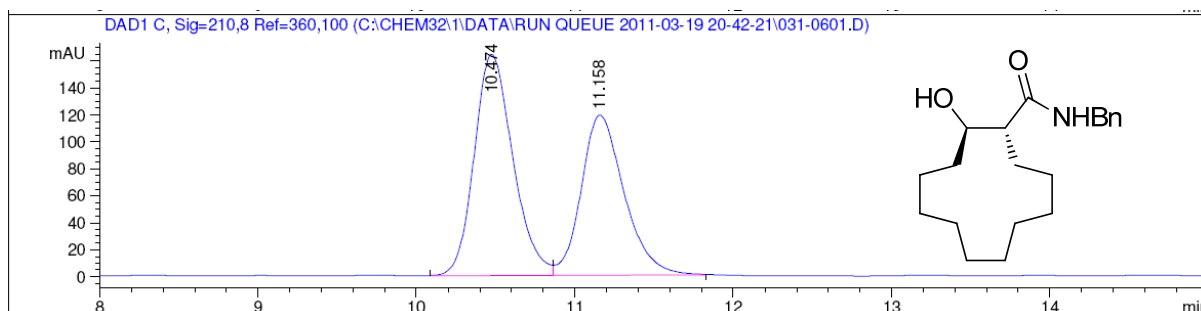

Signal 2: DAD1 C, Sig=210,8 Ref=360,100

| Peak # | RetTime [min] | Type | Width [min] | Area [mAU*s] | Height [mAU] | Area %  |
|--------|---------------|------|-------------|--------------|--------------|---------|
| 1      | 10.474        | BV   | 0.2602      | 2786.83691   | 164.07961    | 55.4109 |
| 2      | 11.158        | VB   | 0.2862      | 2242.56543   | 118.80946    | 44.5891 |

Totals : 5029.40234 282.88906

***trans*-N-Benzyl-2-hydroxycyclooctanecarboxamide**

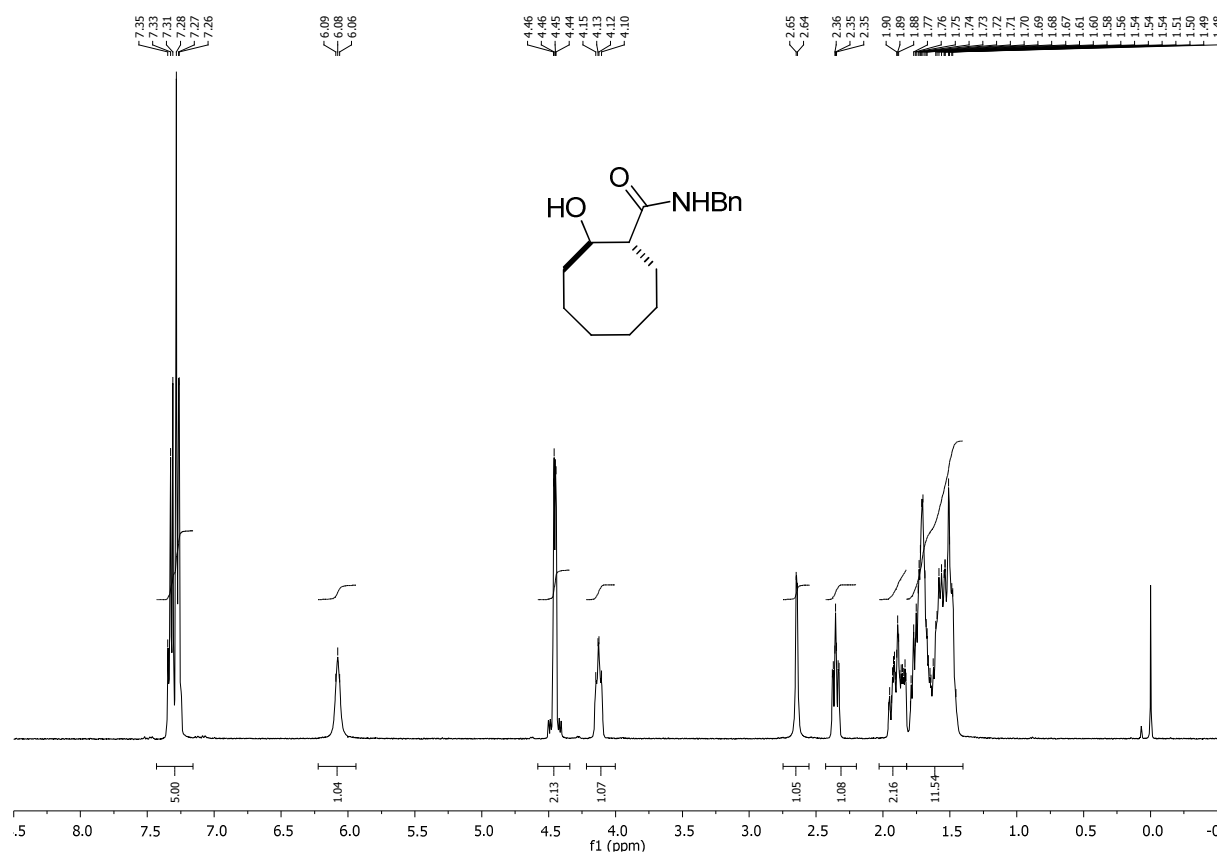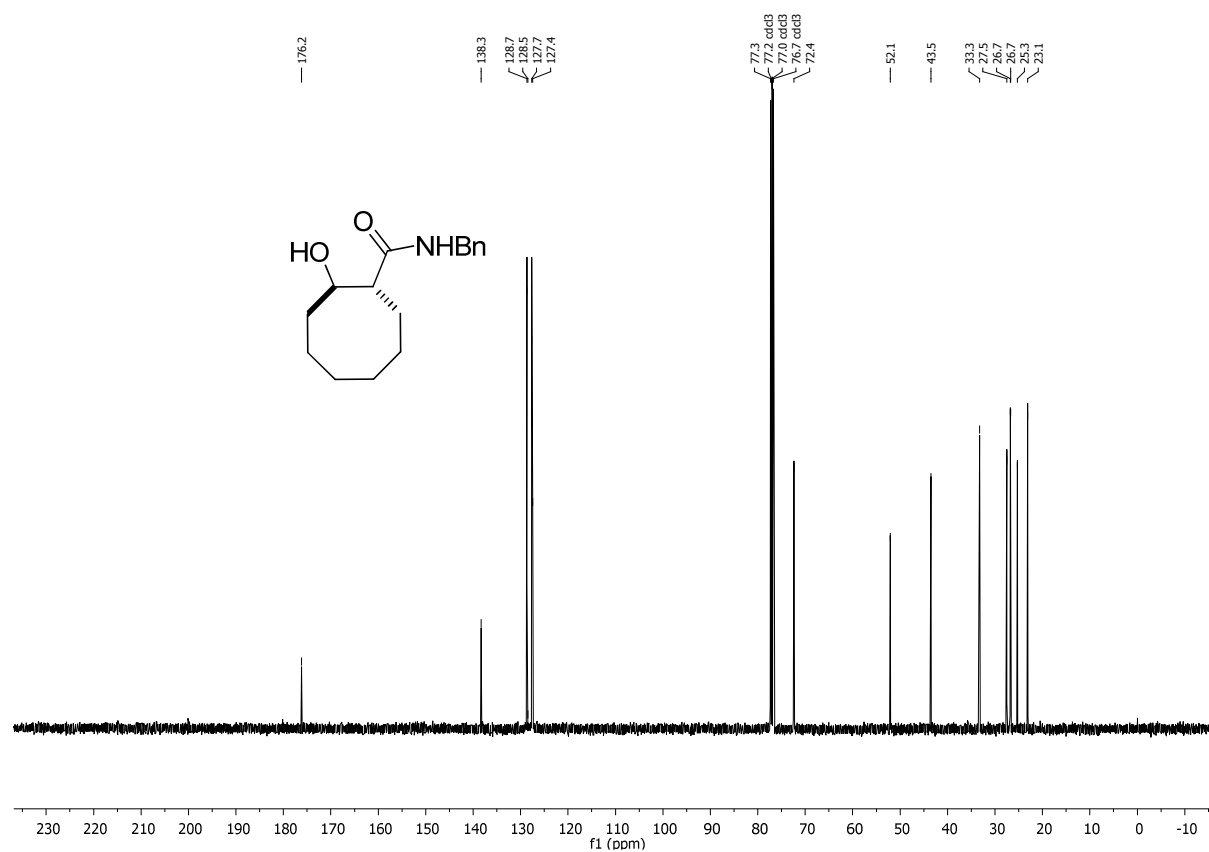



**(±)-*trans*-N-Benzyl-2-hydroxycyclooctanecarboxamide (racemic)**

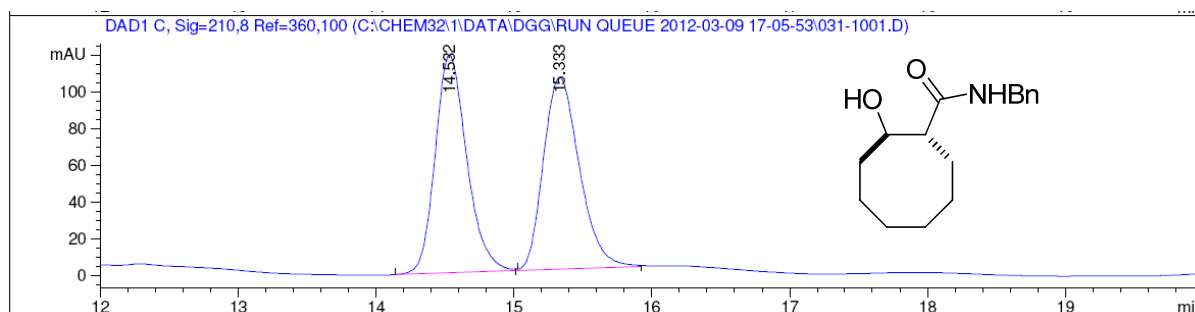

Signal 2: DAD1 C, Sig=210,8 Ref=360,100

| Peak # | RetTime [min] | Type | Width [min] | Area [mAU*s] | Height [mAU] | Area %  |
|--------|---------------|------|-------------|--------------|--------------|---------|
| 1      | 14.532        | BB   | 0.2461      | 1893.20935   | 118.67139    | 49.9813 |
| 2      | 15.333        | BB   | 0.2793      | 1894.62891   | 104.61658    | 50.0187 |

Totals : 3787.83826 223.28796

**(+)-*trans*-N-Benzyl-2-hydroxycyclooctanecarboxamide with catalyst 1 (11% ee)**

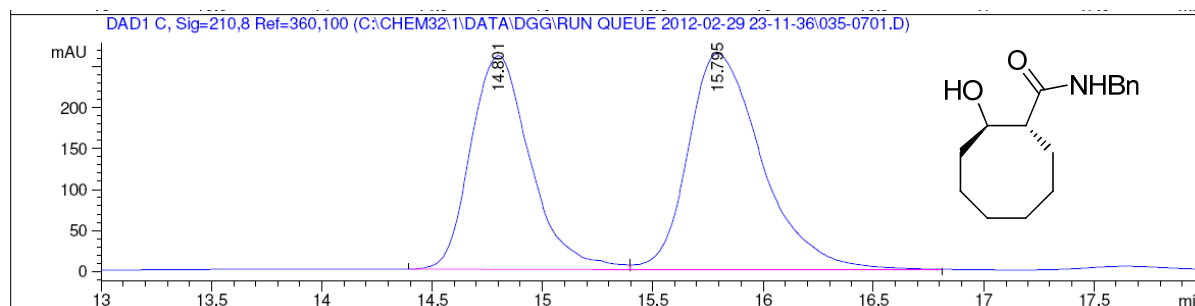

Signal 2: DAD1 C, Sig=210,8 Ref=360,100

| Peak # | RetTime [min] | Type | Width [min] | Area [mAU*s] | Height [mAU] | Area %  |
|--------|---------------|------|-------------|--------------|--------------|---------|
| 1      | 14.801        | BV   | 0.2871      | 4892.23633   | 260.49808    | 44.4637 |
| 2      | 15.795        | VB   | 0.3607      | 6110.52588   | 263.30746    | 55.5363 |

Totals : 1.10028e4 523.80554

**(-)-*trans*-N-Benzyl-2-hydroxycyclooctanecarboxamide with catalyst 3 (6% *ee*)**

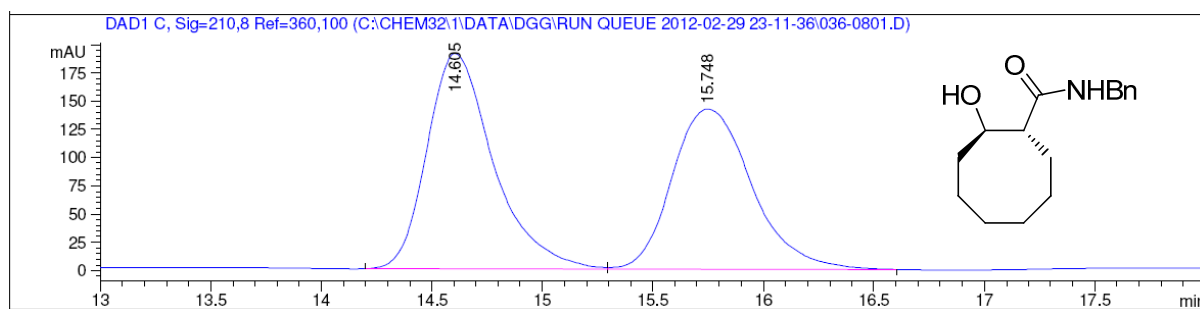

Signal 2: DAD1 C, Sig=210,8 Ref=360,100

| Peak # | RetTime [min] | Type | Width [min] | Area [mAU*s] | Height [mAU] | Area %  |
|--------|---------------|------|-------------|--------------|--------------|---------|
| 1      | 14.605        | BV   | 0.3181      | 3992.18311   | 190.82686    | 52.7507 |
| 2      | 15.748        | VB   | 0.3976      | 3575.83325   | 142.08011    | 47.2493 |

Totals : 7568.01636 332.90697

***trans*-N-Benzyl-2-hydroxycycloheptanecarboxamide**

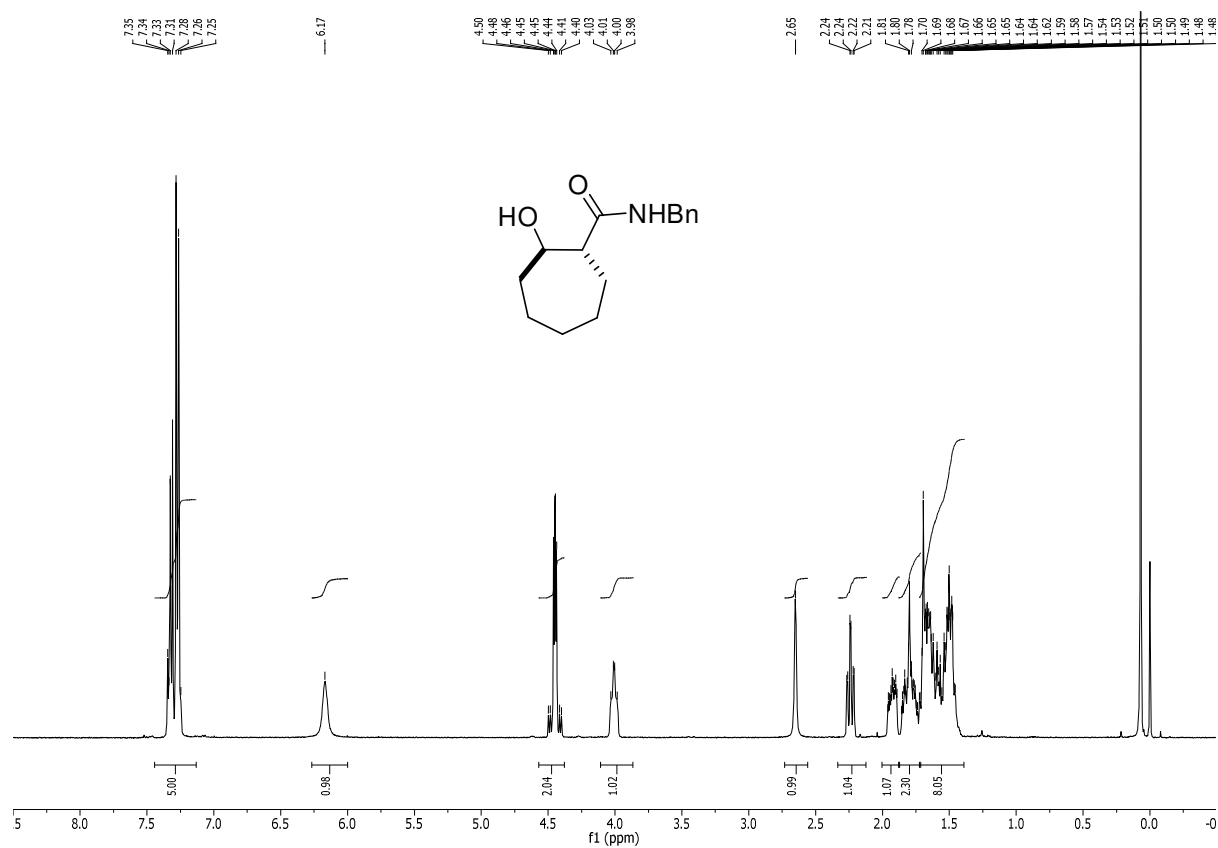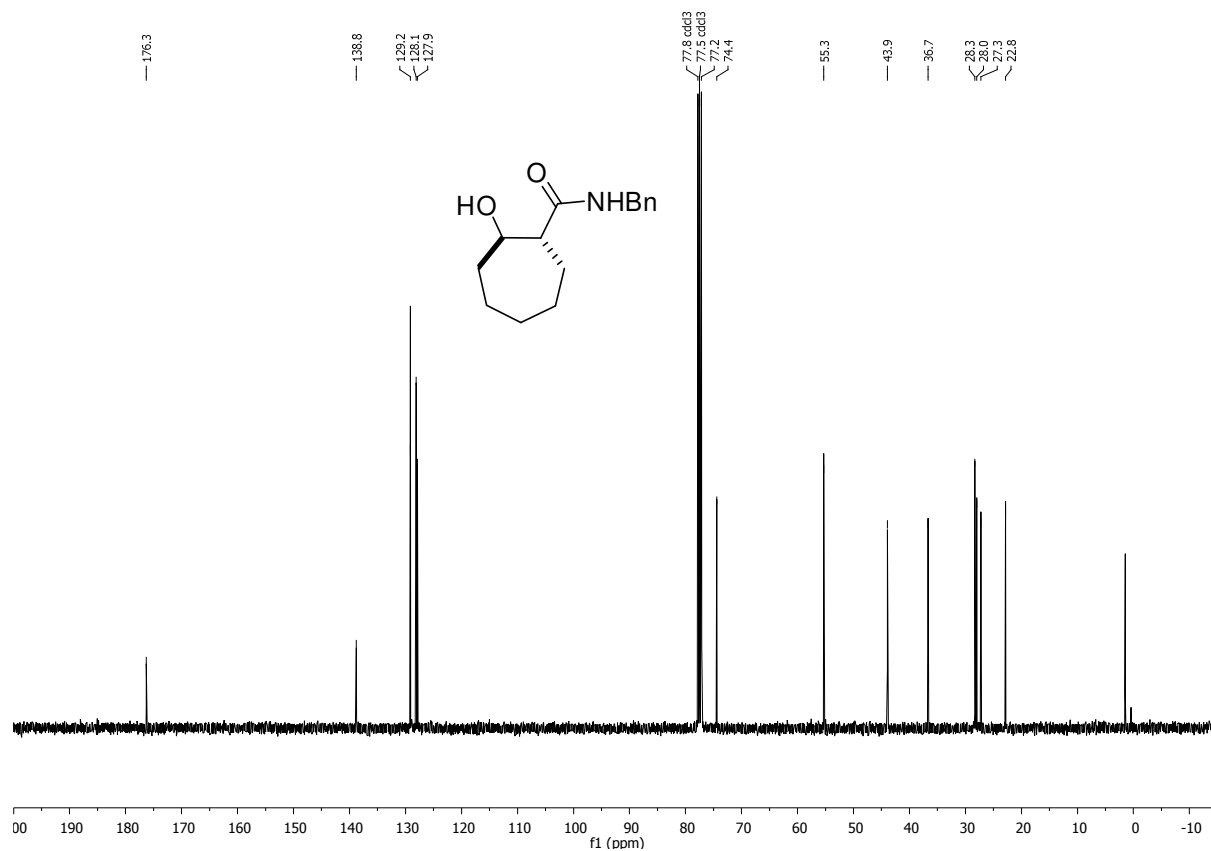

**(±)-*N*-Benzyl-2-hydroxycycloheptanecarboxamide (racemic)**

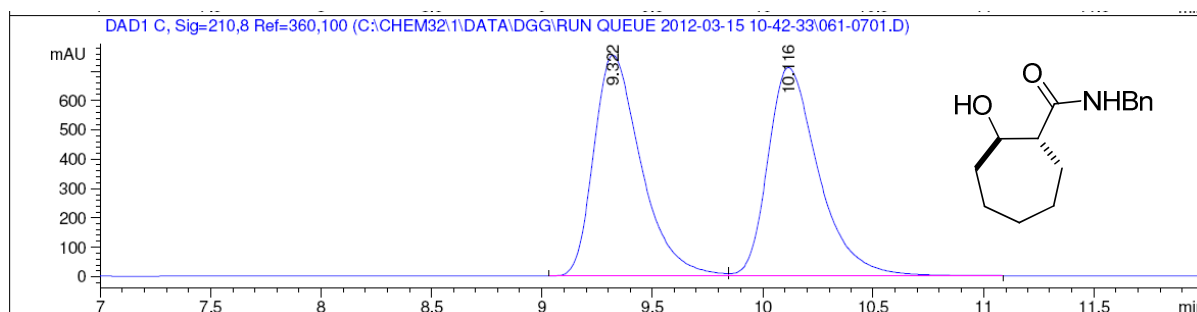

Signal 2: DAD1 C, Sig=210,8 Ref=360,100

| Peak # | RetTime [min] | Type | Width [min] | Area [mAU*s] | Height [mAU] | Area %  |
|--------|---------------|------|-------------|--------------|--------------|---------|
| 1      | 9.322         | BV   | 0.2296      | 1.12177e4    | 753.76172    | 49.6929 |
| 2      | 10.116        | VB   | 0.2423      | 1.13563e4    | 711.02148    | 50.3071 |

Totals : 2.25740e4 1464.78320

**(-)-*N*-Benzyl-2-hydroxycycloheptanecarboxamide with catalyst 1 (4% ee)**

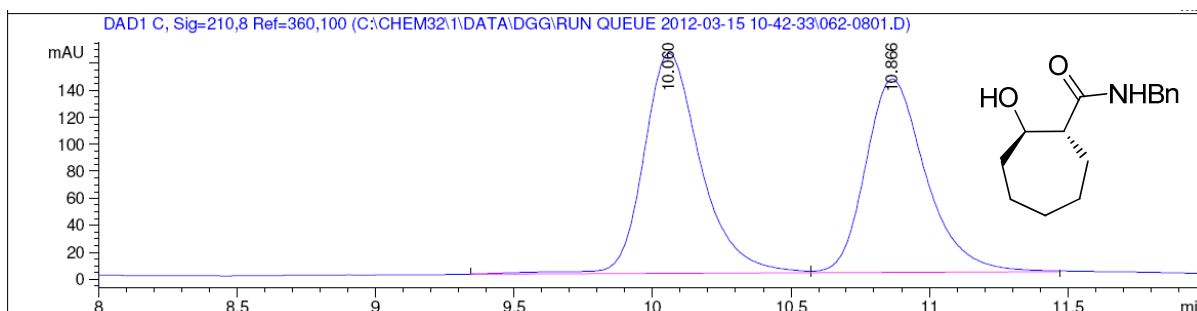

Signal 2: DAD1 C, Sig=210,8 Ref=360,100

| Peak # | RetTime [min] | Type | Width [min] | Area [mAU*s] | Height [mAU] | Area %  |
|--------|---------------|------|-------------|--------------|--------------|---------|
| 1      | 10.060        | BV   | 0.2157      | 2342.89160   | 163.00114    | 52.0488 |
| 2      | 10.866        | VB   | 0.2319      | 2158.44702   | 143.17899    | 47.9512 |

Totals : 4501.33862 306.18013

**(-)-*N*-Benzyl-2-hydroxycycloheptanecarboxamide with catalyst 3 (16% *ee*)**

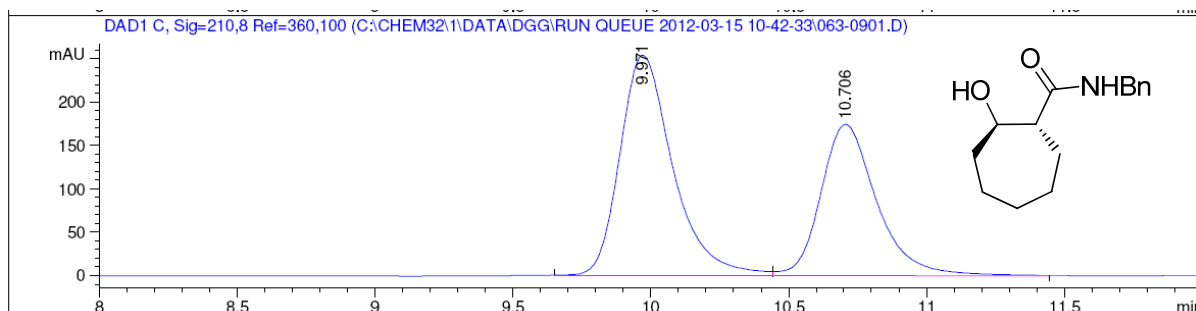

Signal 2: DAD1 C, Sig=210,8 Ref=360,100

| Peak # | RetTime [min] | Type | Width [min] | Area [mAU*s] | Height [mAU] | Area %  |
|--------|---------------|------|-------------|--------------|--------------|---------|
| 1      | 9.971         | BV   | 0.2021      | 3400.28442   | 254.16425    | 57.9633 |
| 2      | 10.706        | VB   | 0.2127      | 2465.98218   | 174.63393    | 42.0367 |

Totals : 5866.26660 428.79817

**(±)-*cis*-N-Benzyl-2-hydroxycyclopentanecarboxamide<sup>12</sup>**

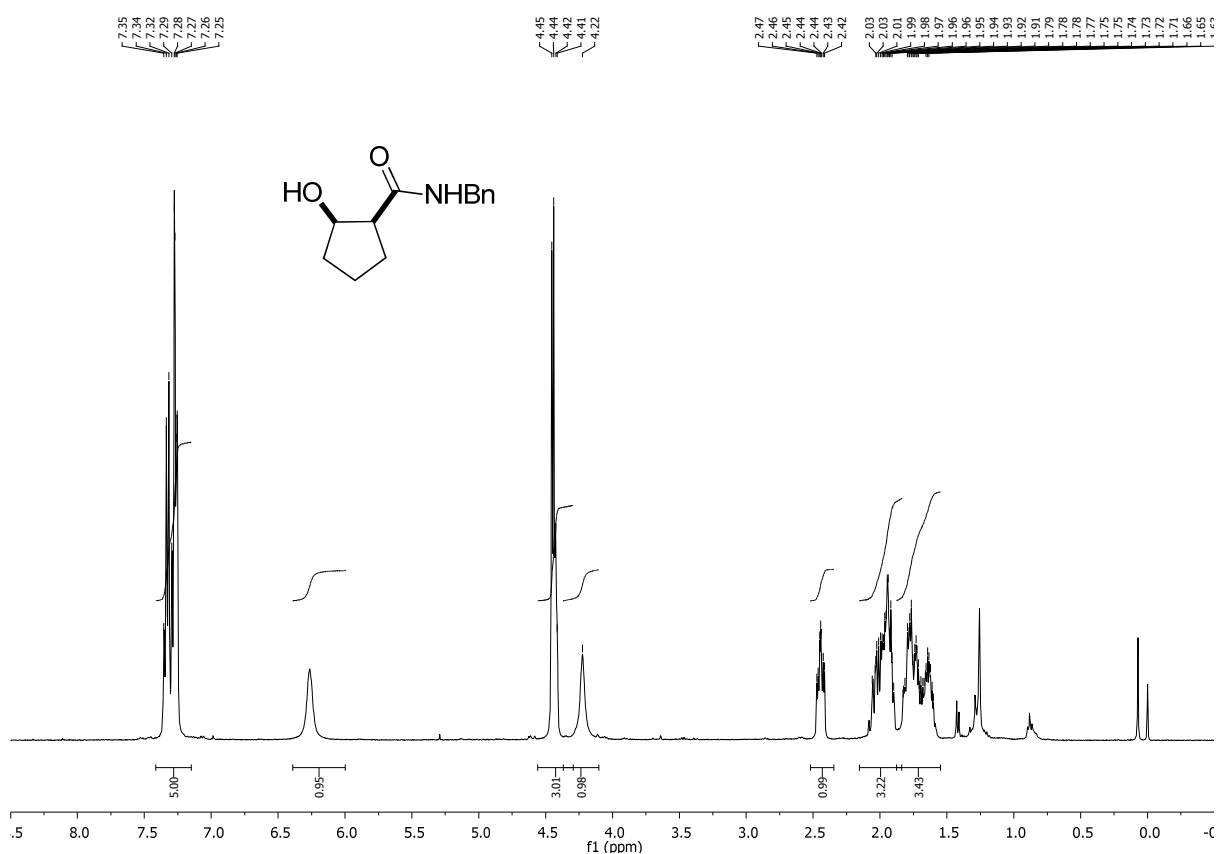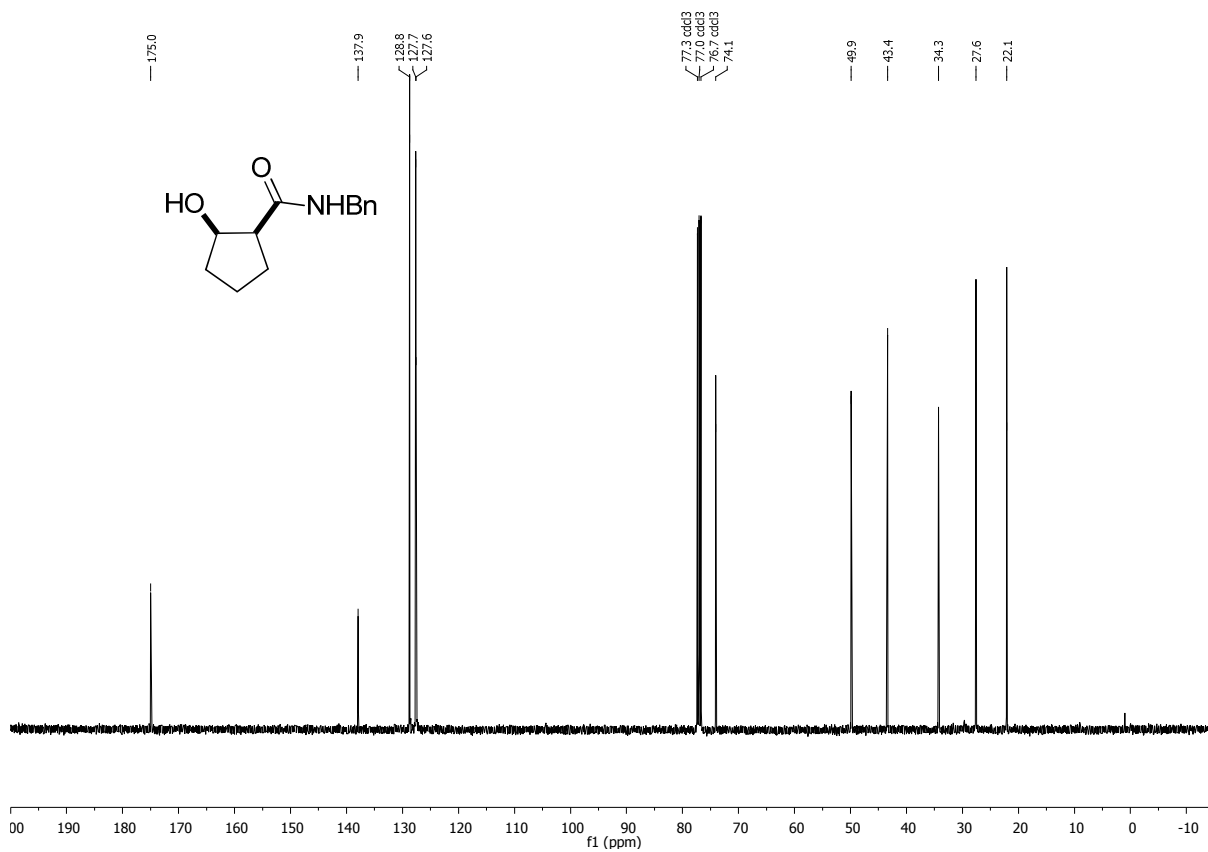

**(±)-*cis*-N-Benzyl-2-hydroxycyclopentanecarboxamide (racemic)**

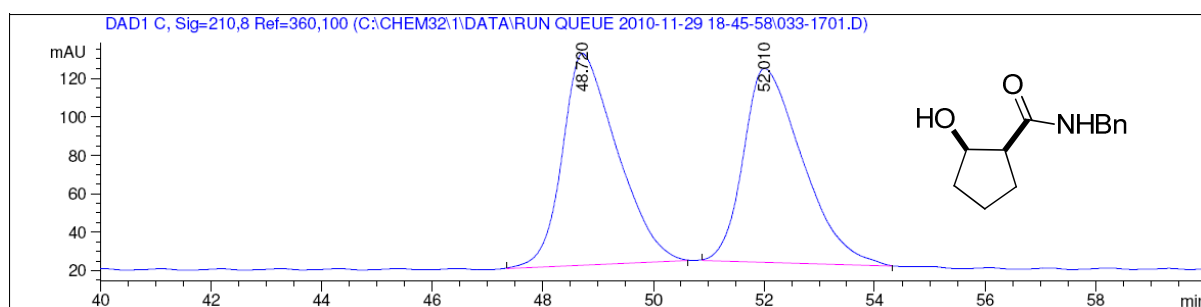

Signal 2: DAD1 C, Sig=210,8 Ref=360,100

| Peak # | RetTime [min] | Type | Width [min] | Area [mAU*s] | Height [mAU] | Area %  |
|--------|---------------|------|-------------|--------------|--------------|---------|
| 1      | 48.720        | BB   | 1.0221      | 7587.07471   | 110.08331    | 50.2412 |
| 2      | 52.010        | BB   | 1.1006      | 7514.23584   | 100.69859    | 49.7588 |

Totals : 1.51013e4 210.78190

**(-)-(1*S*,2*R*)- N-Benzyl-2-hydroxycyclopentanecarboxamide with catalyst 1 (40% *ee*)**

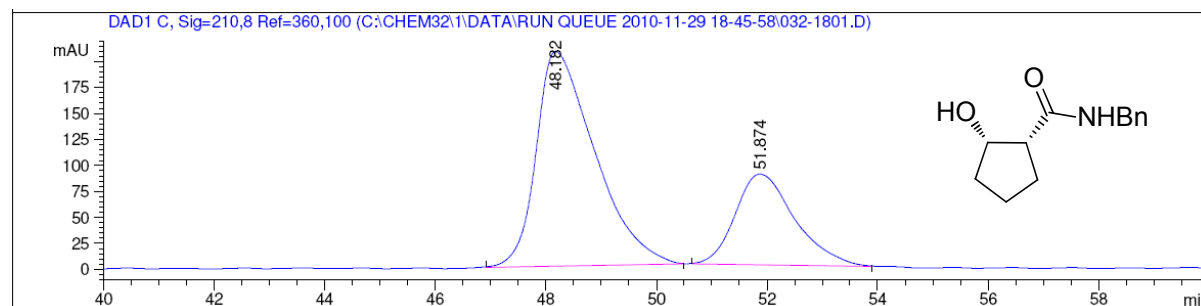

Signal 2: DAD1 C, Sig=210,8 Ref=360,100

| Peak # | RetTime [min] | Type | Width [min] | Area [mAU*s] | Height [mAU] | Area %  |
|--------|---------------|------|-------------|--------------|--------------|---------|
| 1      | 48.182        | BB   | 1.0698      | 1.52087e4    | 206.36102    | 70.1076 |
| 2      | 51.874        | BB   | 1.1245      | 6484.66016   | 87.10454     | 29.8924 |

Totals : 2.16934e4 293.46556

**(-)-(1*S*,2*R*)-*N*-Benzyl-2-hydroxycyclopentanecarboxamide with catalyst 3 (33% *ee*)**

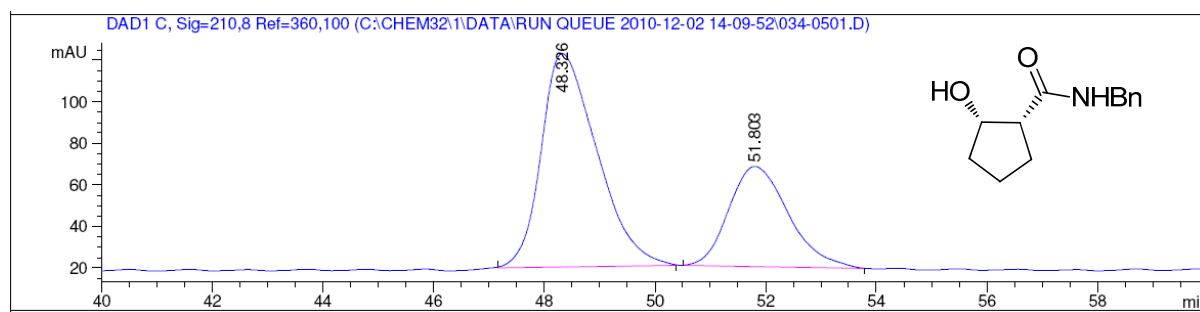

Signal 2: DAD1 C, Sig=210,8 Ref=360,100

| Peak # | RetTime [min] | Type | Width [min] | Area [mAU*s] | Height [mAU] | Area %  |
|--------|---------------|------|-------------|--------------|--------------|---------|
| 1      | 48.326        | BB   | 1.0418      | 7197.42773   | 102.68043    | 66.6250 |
| 2      | 51.803        | BB   | 1.1403      | 3605.46387   | 48.22161     | 33.3750 |

Totals : 1.08029e4 150.90203



***cis*-Dimethyl-3-(benzylcarbamoyl)-4-hydroxycyclopentane-1,1-dicarboxylate**

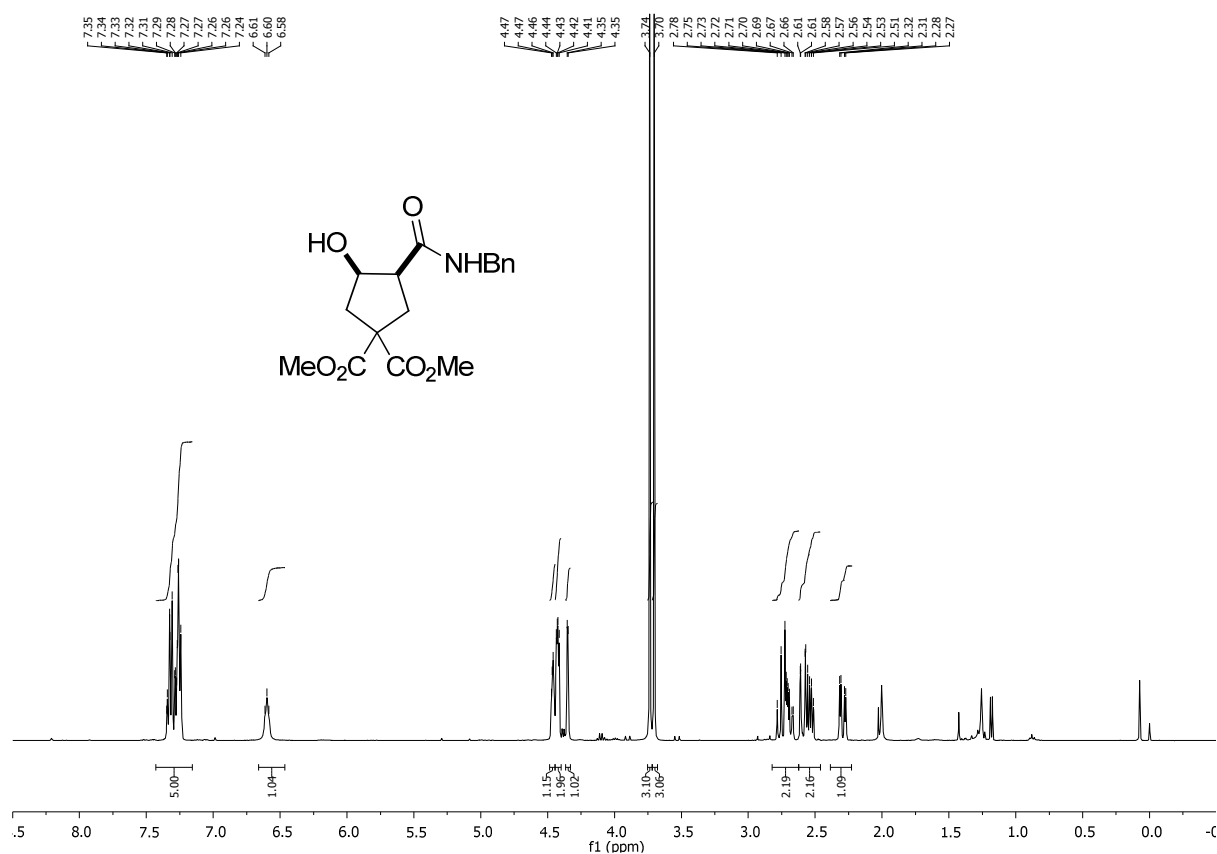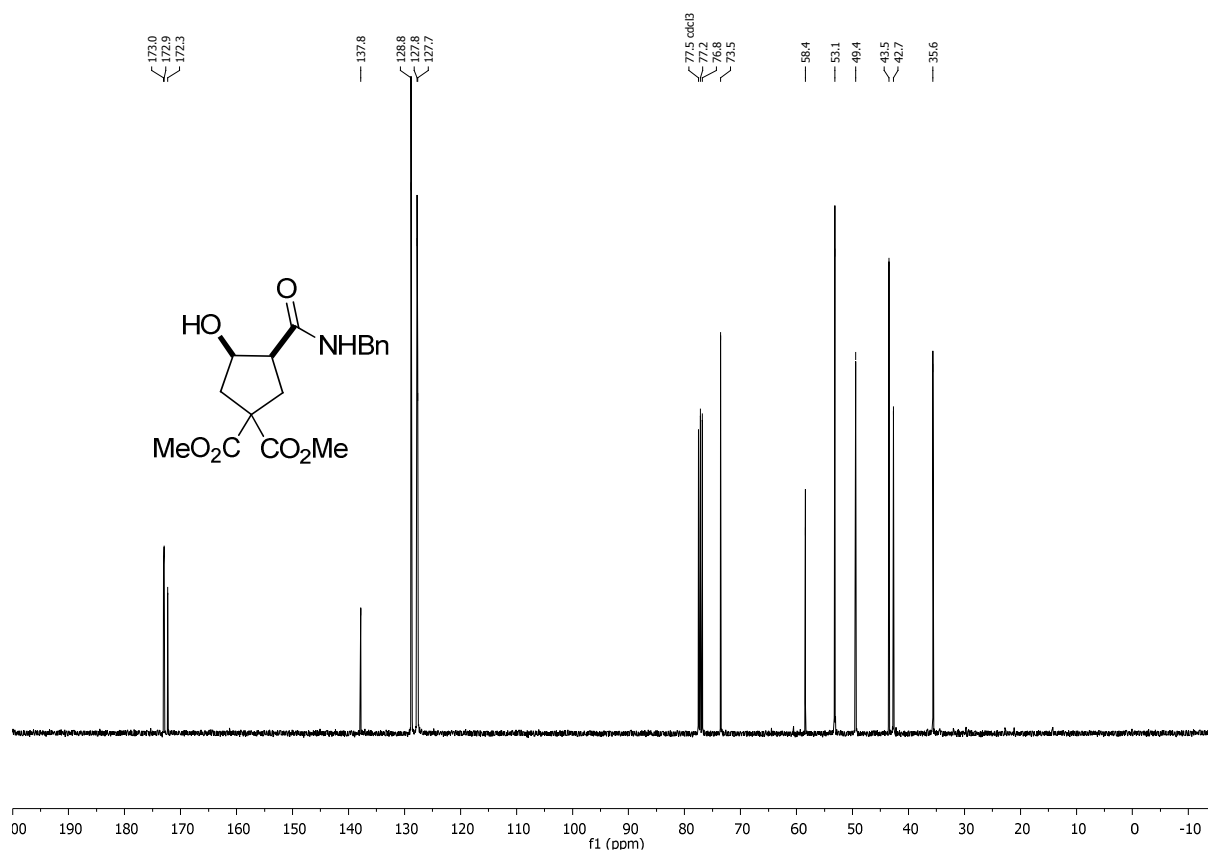

**(±)-*cis*-Dimethyl-3-(benzylcarbamoyl)-4-hydroxycyclopentane-1,1-dicarboxylate  
(racemic)**

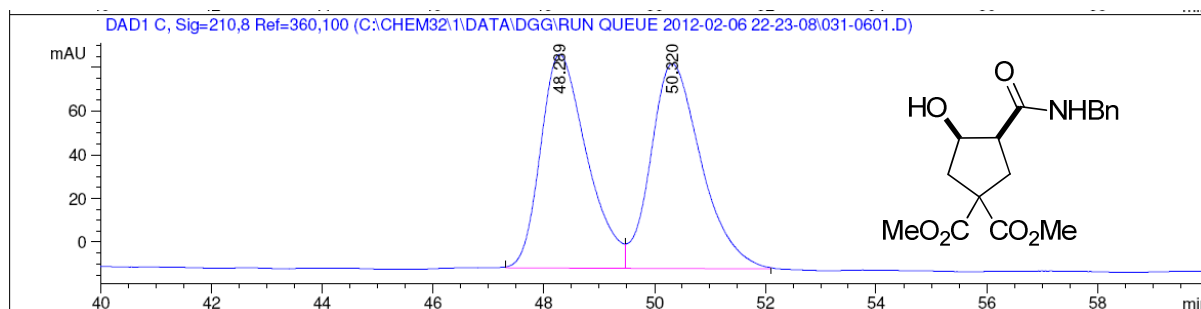

Signal 2: DAD1 C, Sig=210,8 Ref=360,100

| Peak # | RetTime [min] | Type | Width [min] | Area [mAU*s] | Height [mAU] | Area %  |
|--------|---------------|------|-------------|--------------|--------------|---------|
| 1      | 48.289        | BV   | 0.8577      | 5654.68604   | 97.63580     | 48.8129 |
| 2      | 50.320        | VB   | 0.9053      | 5929.73193   | 93.57759     | 51.1871 |

Totals : 1.15844e4 191.21339

**(+)-(1*R*,2*S*)-Dimethyl-3-(benzylcarbamoyl)-4-hydroxycyclopentane-1,1-dicarboxylate  
with catalyst 1 (45% ee)**

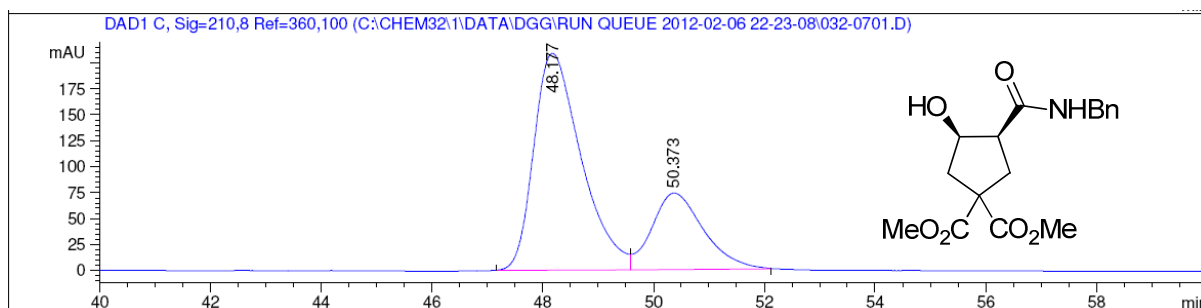

Signal 2: DAD1 C, Sig=210,8 Ref=360,100

| Peak # | RetTime [min] | Type | Width [min] | Area [mAU*s] | Height [mAU] | Area %  |
|--------|---------------|------|-------------|--------------|--------------|---------|
| 1      | 48.177        | BV   | 0.8603      | 1.24249e4    | 208.77896    | 72.2503 |
| 2      | 50.373        | VB   | 0.9356      | 4772.11084   | 73.67954     | 27.7497 |

Totals : 1.71970e4 282.45850

**(+)-(1*R*,2*S*)-Dimethyl-3-(benzylcarbamoyl)-4-hydroxycyclopentane-1,1-dicarboxylate**  
**with catalyst 3 (41% *ee*)**

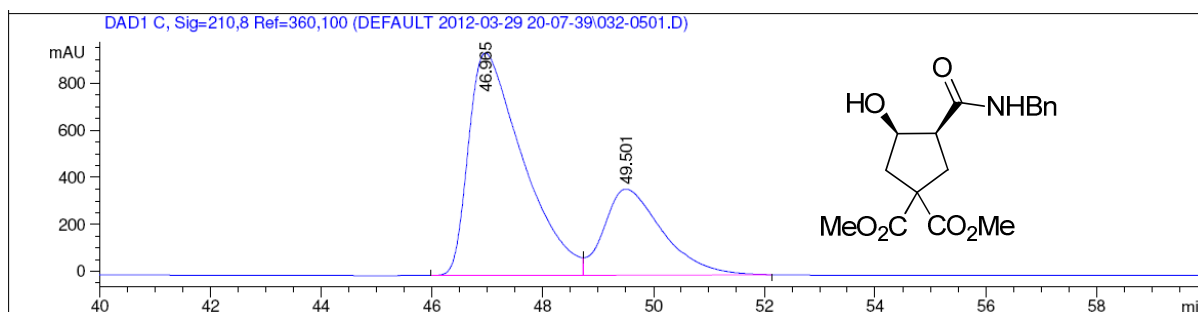

Signal 2: DAD1 C, Sig=210,8 Ref=360,100

| Peak # | RetTime [min] | Type | Width [min] | Area [mAU*s] | Height [mAU] | Area %  |
|--------|---------------|------|-------------|--------------|--------------|---------|
| 1      | 46.965        | BV   | 0.9614      | 6.46423e4    | 945.72095    | 70.6761 |
| 2      | 49.501        | VB   | 1.0194      | 2.68205e4    | 365.81467    | 29.3239 |

Totals : 9.14628e4 1311.53561

*cis*-*N*-Benzyl-4-hydroxytetrahydrofuran-3-carboxamide

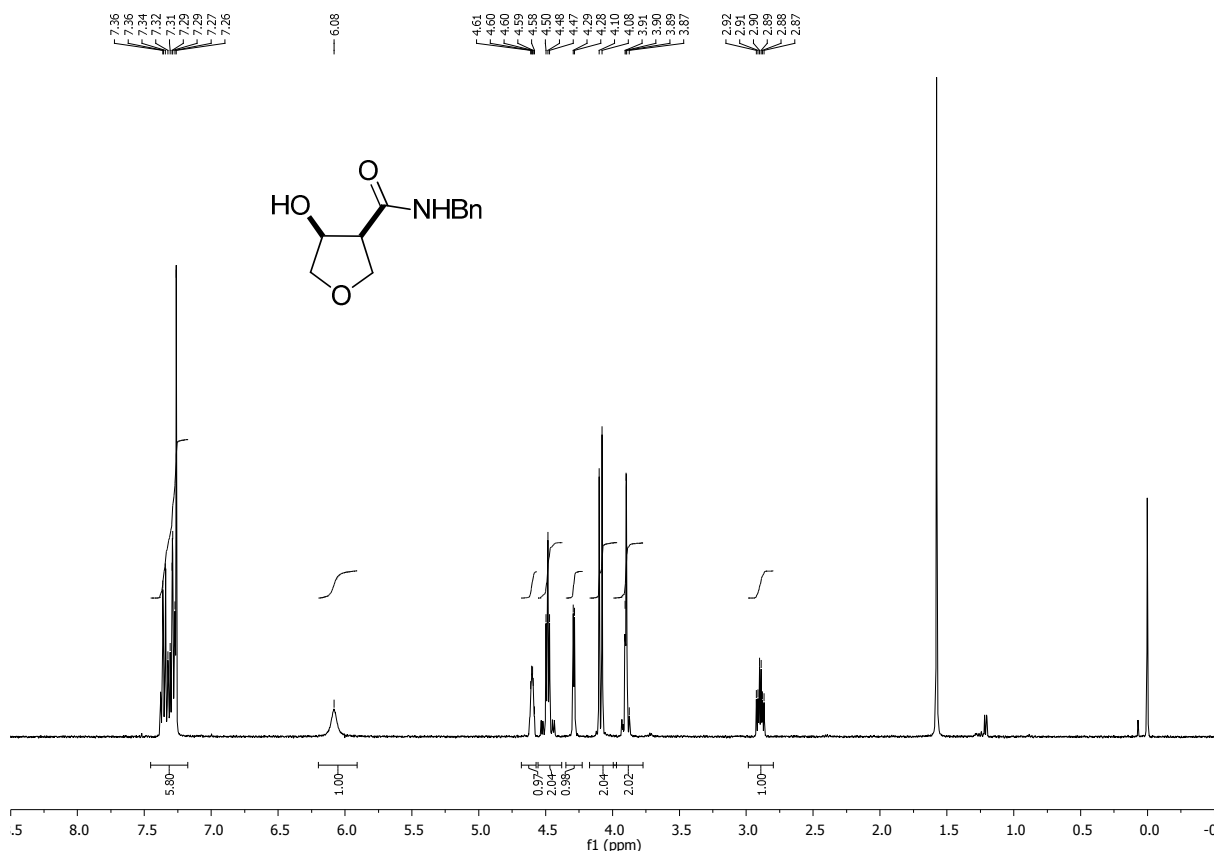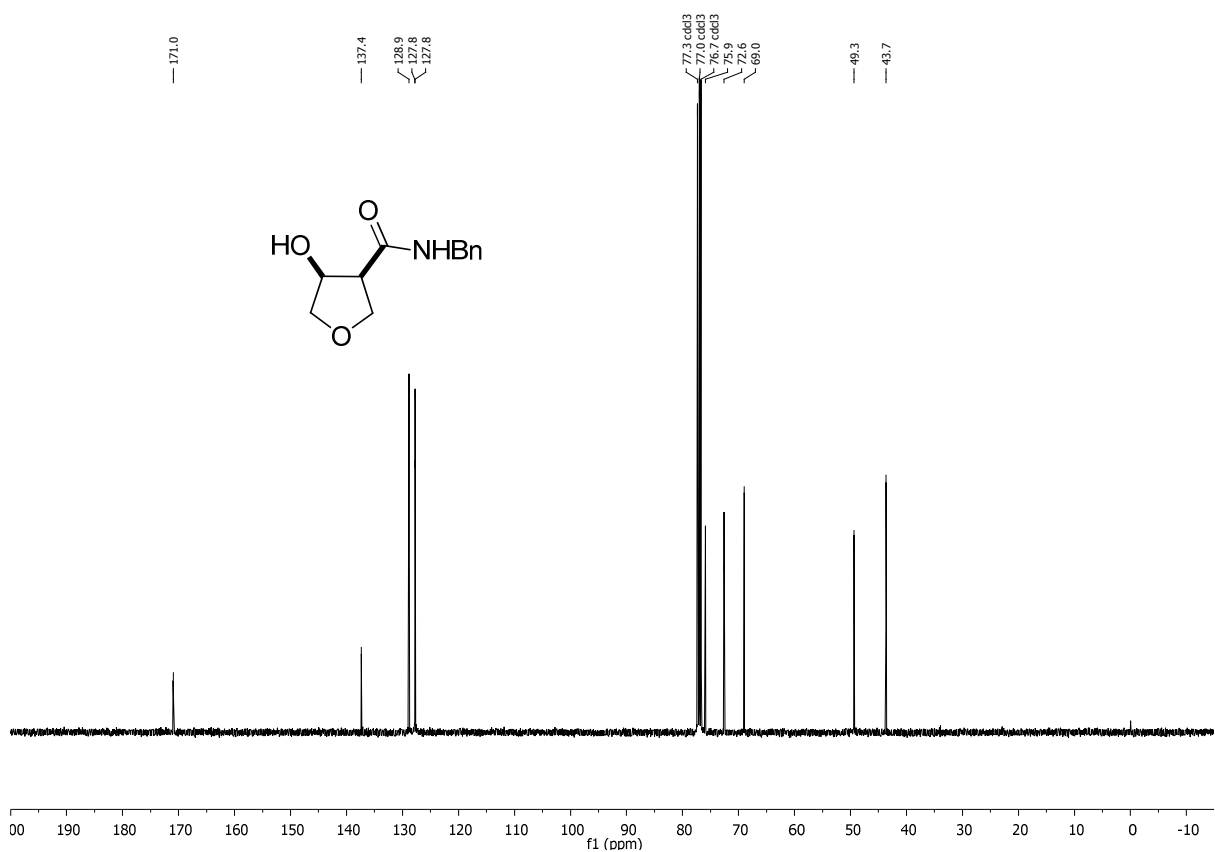

***cis*-N-Benzyl-4-hydroxytetrahydrofuran-3-carboxamide (racemic)**

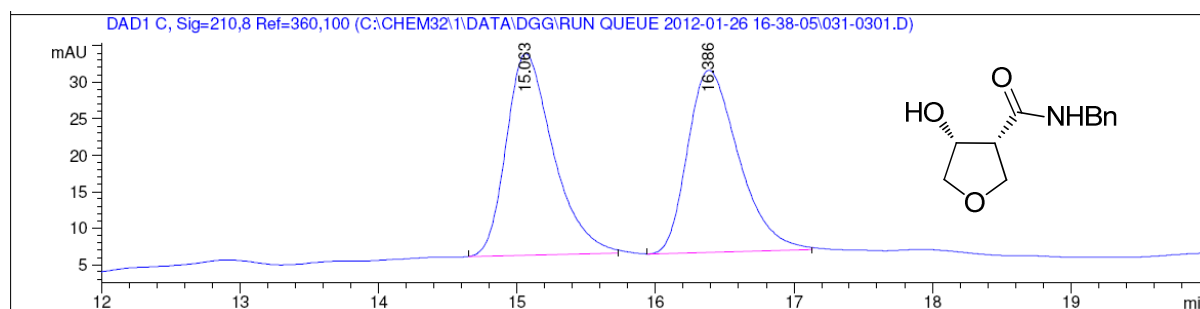

Signal 2: DAD1 C, Sig=210,8 Ref=360,100

| Peak # | RetTime [min] | Type | Width [min] | Area [mAU*s] | Height [mAU] | Area %  |
|--------|---------------|------|-------------|--------------|--------------|---------|
| 1      | 15.063        | BB   | 0.3616      | 652.18219    | 27.61157     | 50.5362 |
| 2      | 16.386        | BB   | 0.3906      | 638.34375    | 24.93894     | 49.4638 |

Totals : 1290.52594 52.55051

***(-)-(1R,2S)*-N-Benzyl-4-hydroxytetrahydrofuran-3-carboxamide with catalyst 1 (56% ee)**

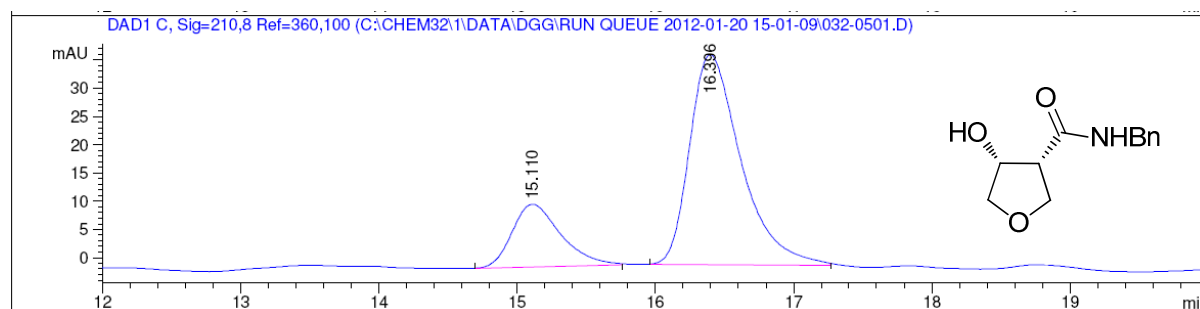

Signal 2: DAD1 C, Sig=210,8 Ref=360,100

| Peak # | RetTime [min] | Type | Width [min] | Area [mAU*s] | Height [mAU] | Area %  |
|--------|---------------|------|-------------|--------------|--------------|---------|
| 1      | 15.110        | BB   | 0.3725      | 269.93988    | 11.06958     | 21.9482 |
| 2      | 16.396        | BB   | 0.3953      | 959.95636    | 37.17350     | 78.0518 |

Totals : 1229.89624 48.24307

**(-)-(1*R*,2*S*)-*N*-Benzyl-4-hydroxytetrahydrofuran-3-carboxamide with catalyst 3 (33% *ee*)**

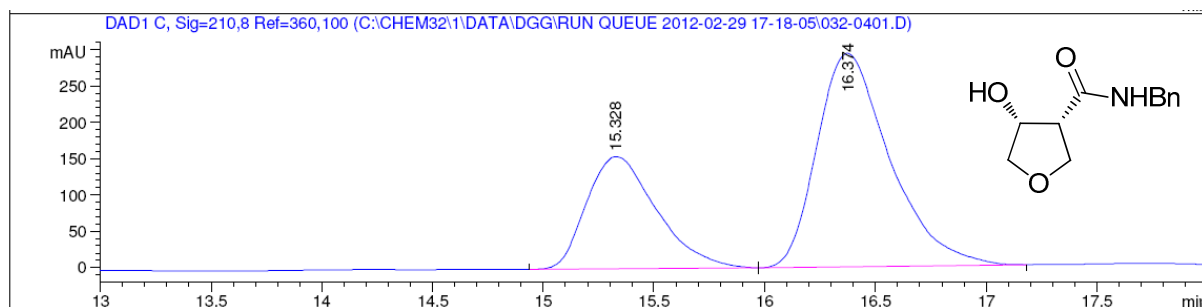

Signal 2: DAD1 C, Sig=210,8 Ref=360,100

| Peak # | RetTime [min] | Type | Width [min] | Area [mAU*s] | Height [mAU] | Area %  |
|--------|---------------|------|-------------|--------------|--------------|---------|
| 1      | 15.328        | BV   | 0.3337      | 3389.81177   | 154.68469    | 33.4747 |
| 2      | 16.374        | VB   | 0.3449      | 6736.67578   | 294.48859    | 66.5253 |

Totals : 1.01265e4 449.17328

**(±)-*trans*-4-Tosyl-8-oxa-4-azabicyclo[5.2.0]nonan-9-one (racemic)**

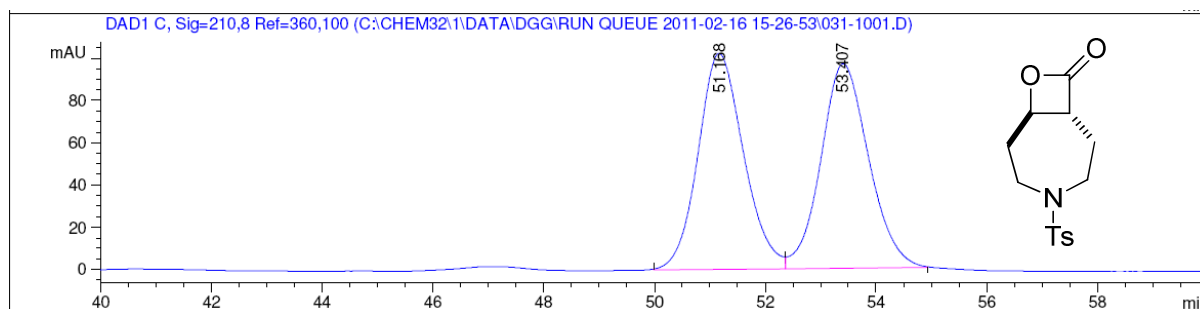

Signal 2: DAD1 C, Sig=210,8 Ref=360,100

| Peak # | RetTime [min] | Type | Width [min] | Area [mAU*s] | Height [mAU] | Area %  |
|--------|---------------|------|-------------|--------------|--------------|---------|
| 1      | 51.168        | BV   | 0.8676      | 5833.23682   | 102.24943    | 50.0870 |
| 2      | 53.407        | VB   | 0.9025      | 5812.96826   | 96.81593     | 49.9130 |

Totals : 1.16462e4 199.06535

**(+)-*trans*-4-Tosyl-8-oxa-4-azabicyclo[5.2.0]nonan-9-one with catalyst 1 (31% ee)**

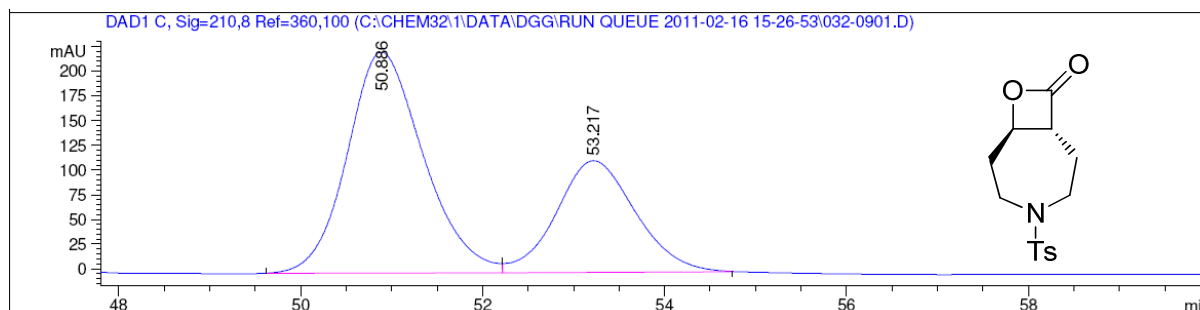

Signal 2: DAD1 C, Sig=210,8 Ref=360,100

| Peak # | RetTime [min] | Type | Width [min] | Area [mAU*s] | Height [mAU] | Area %  |
|--------|---------------|------|-------------|--------------|--------------|---------|
| 1      | 50.886        | BV   | 0.8812      | 1.30254e4    | 223.72398    | 65.5532 |
| 2      | 53.217        | VB   | 0.9109      | 6844.55469   | 112.96080    | 34.4468 |

Totals : 1.98699e4 336.68478

**(-)-trans-4-Tosyl-8-oxa-4-azabicyclo[5.2.0]nonan-9-one with catalyst 3 (31% ee)**

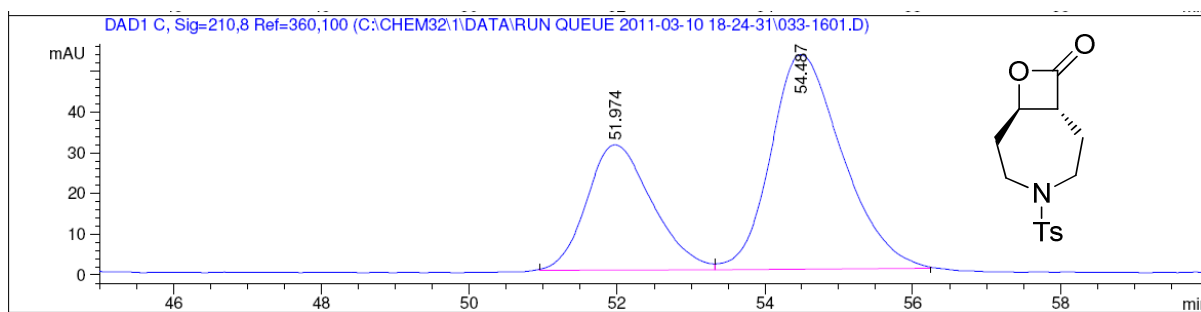

Signal 2: DAD1 C, Sig=210,8 Ref=360,100

| Peak #   | RetTime [min] | Type | Width [min] | Area [mAU*s] | Height [mAU] | Area %  |
|----------|---------------|------|-------------|--------------|--------------|---------|
| 1        | 51.974        | BV   | 0.9068      | 1892.13208   | 30.71216     | 34.7161 |
| 2        | 54.487        | VB   | 1.0054      | 3558.17212   | 52.58985     | 65.2839 |
| Totals : |               |      |             | 5450.30420   | 83.30202     |         |



**Crystal structure of ( $\pm$ )-*trans*-N-Benzyl-8-hydroxycyclooct-4-enecarboxamide**

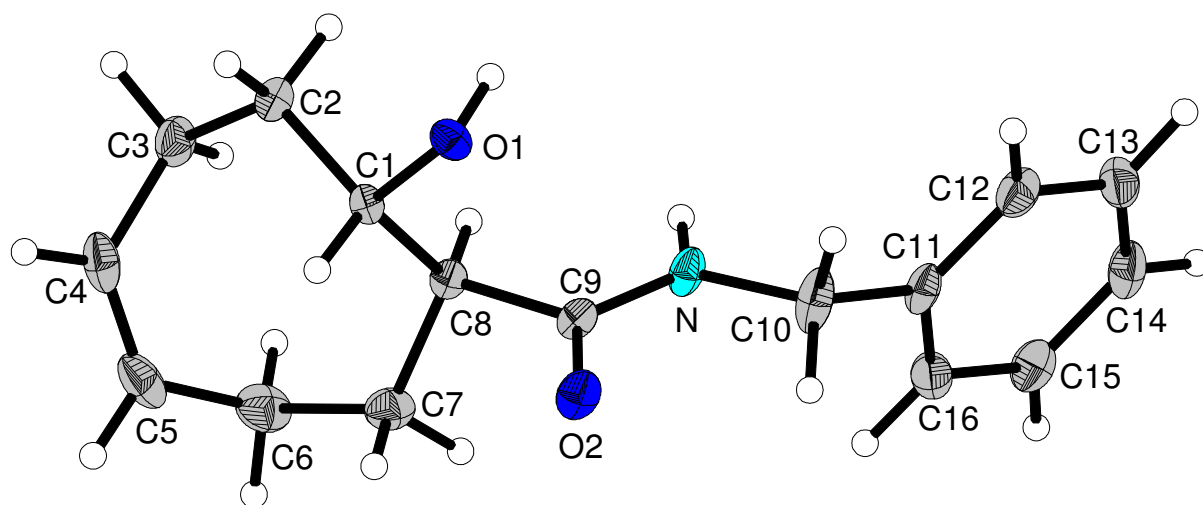

$\beta$ -hydroxy benzylamide derivative of cyclooctene drawn at the 50% probability level
